# Supplementary material for: The White-Spotted Bamboo Shark Genome Reveals Chromosome Rearrangements and Fast-Evolving Immune Genes of Cartilaginous Fish
Source: PubMed Central journal article supplement — iScience. 2020 Nov 2;23(11):101754. doi: 10.1016/j.isci.2020.101754 (PMC7677710; doi:10.1016/j.isci.2020.101754), 2020-11-02
Supplement: mmc1.pdf [file mmc1.pdf]

## **Supplemental Information**

### **The White-Spotted Bamboo Shark Genome Reveals Chromosome Rearrangements and Fast-Evolving Immune Genes of Cartilaginous Fish**

**Yaolei Zhang, Haoyang Gao, Hanbo Li, Jiao Guo, Bingjie Ouyang, Meiniang Wang, Qiwu Xu, Jiahao Wang, Meiqi Lv, Xinyu Guo, Qun Liu, Likun Wei, Han Ren, Yang Xi, Yang Guo, Bingzhao Ren, Shanshan Pan, Chuxin Liu, Xiaoyan Ding, Haitao Xiang, Yingjia Yu, Yue Song, Lingfeng Meng, Shanshan Liu, Jun Wang, Yuan Jiang, Jiahai Shi, Shiping Liu, Jamal S.M. Sabir, Mumdooh J. Sabir, Muhummadh Khan, Nahid H. Hajrah, Simon Ming-Yuen Lee, Xun Xu, Huanming Yang, Jian Wang, Guangyi Fan, Naibo Yang, and Xin Liu**

## Supplemental information for:

### The white-spotted bamboo shark genome reveals chromosome rearrangements and fast-evolving immune genes of cartilaginous fish

Yaolei Zhang<sup>1,4,8,†</sup>, Haoyang Gao<sup>1,4,†</sup>, Hanbo Li<sup>1,4,†</sup>, Jiao Guo<sup>1,4,†</sup>, Bingjie Ouyang<sup>1,4</sup>, Meiniang Wang<sup>2,4</sup>, Qiwu Xu<sup>1,4</sup>, Jiahao Wang<sup>1,4</sup>, Meiqi Lv<sup>1,4</sup>, Xinyu Guo<sup>1,4</sup>, Qun Liu<sup>1,4</sup>, Likun Wei<sup>5</sup>, Han Ren<sup>2,4</sup>, Yang Xi<sup>2,4</sup>, Yang Guo<sup>1,4</sup>, Bingzhao Ren<sup>1,4</sup>, Shanshan Pan<sup>1,4</sup>, Chuxin Liu<sup>2,4</sup>, Xiaoyan Ding<sup>1,4</sup>, Haitao Xiang<sup>2,4</sup>, Yingjia Yu<sup>1,4</sup>, Yue Song<sup>1,4</sup>, Lingfeng Meng<sup>1,4</sup>, Shanshan Liu<sup>1,4</sup>, Jun Wang<sup>1,4</sup>, Yuan Jiang<sup>2,6</sup>, Jiahai Shi<sup>5</sup>, Shiping Liu<sup>2,4</sup>, Jamal S. M. Sabir<sup>9</sup>, Mumdooh J. Sabir<sup>9</sup>, Muhummadh Khan<sup>9</sup>, Nahid H. Hajrah<sup>9</sup>, Simon Ming-Yuen Lee<sup>3</sup>, Xun Xu<sup>2,4</sup>, Huanming Yang<sup>2,7</sup>, Jian Wang<sup>2,7</sup>, Guangyi Fan<sup>1,3,4,\*</sup>, Naibo Yang<sup>2,6,\*</sup> & Xin Liu<sup>1,2,4,10,\*</sup>

**This file includes:** Transparent Methods, Figures S1–S14, Tables S1-S9 and S12-S16.

|                                                                                                                                                                                                                                                         |    |
|---------------------------------------------------------------------------------------------------------------------------------------------------------------------------------------------------------------------------------------------------------|----|
| <b>Transparent Methods</b> .....                                                                                                                                                                                                                        | 4  |
| <b>DNA, RNA extraction</b> .....                                                                                                                                                                                                                        | 4  |
| <b>Library construction</b> .....                                                                                                                                                                                                                       | 4  |
| <b>Sequencing for all libraries</b> .....                                                                                                                                                                                                               | 6  |
| <b>Genome assembly and annotation</b> .....                                                                                                                                                                                                             | 6  |
| <b>Construction of phylogenetic tree</b> .....                                                                                                                                                                                                          | 8  |
| <b>Evolution of chromosomes</b> .....                                                                                                                                                                                                                   | 9  |
| <b>MHC genes and P2X gene family analysis</b> .....                                                                                                                                                                                                     | 9  |
| <b>Identification of IgNAR</b> .....                                                                                                                                                                                                                    | 10 |
| <b>Bamboo shark vNAR phage display library construction</b> .....                                                                                                                                                                                       | 10 |
| <b>Bamboo shark vNAR phage display library screening</b> .....                                                                                                                                                                                          | 11 |
| <b>Phage ELISA</b> .....                                                                                                                                                                                                                                | 12 |
| <b>Supplementary Figures</b> .....                                                                                                                                                                                                                      | 13 |
| <b>Figure S1.</b> GC content of the assembled bamboo shark, elephant shark, and whale shark genomes, Related to Figure 1. ....                                                                                                                          | 13 |
| <b>Figure S2.</b> Circos plot of the genomic landscape, Related to Figure 1. ....                                                                                                                                                                       | 14 |
| <b>Figure S3.</b> Circos plot of comparisons between bamboo shark and chicken, Related to Figure 1.....                                                                                                                                                 | 15 |
| <b>Figure S4.</b> Synteny relationship of bamboo shark and zebrafish, Related to Figure 1. ....                                                                                                                                                         | 16 |
| <b>Figure S5.</b> Whole genome duplication in elephant shark, bamboo shark and zebra fish genomes as revealed through 4DTv analyses, Related to Figure 1. ....                                                                                          | 17 |
| <b>Figure S6.</b> HOX gene clusters identified in five species, Related to Figure 1. ....                                                                                                                                                               | 18 |
| <b>Figure S7.</b> Distribution of shared paralogous genes of bamboo shark and elephant shark, Related to Figure 2.....                                                                                                                                  | 19 |
| <b>Figure S8.</b> Distributions of conserved regions of six cartilaginous fishes (bamboo shark, elephant shark, whale shark, brownbanded bamboo shark, cloudy catshark and white shark) on 51 chromosomes of the bamboo shark, Related to Figure 2..... | 20 |
| <b>Figure S9.</b> Distributions of conserved regions between bamboo shark and medaka on 51 chromosomes of the bamboo shark, Related to Figure 2. ....                                                                                                   | 21 |
| <b>Figure S10.</b> Distributions of conserved regions between bamboo shark and spotted gar on 51 chromosomes of the bamboo shark, Related to Figure 2. ....                                                                                             | 22 |
| <b>Figure S11.</b> Hypothetical model of MHC genes evolution, Related to Figure 3.....                                                                                                                                                                  | 23 |
| <b>Figure S12.</b> Gene tree of <i>TRIM69</i> , Related to Figure 3.....                                                                                                                                                                                | 24 |

|                                                                                                                                                                                             |    |
|---------------------------------------------------------------------------------------------------------------------------------------------------------------------------------------------|----|
| <b>Figure S13.</b> Re-assembled IgNAR region supported by paired-end reads, Related to Figure 3.....                                                                                        | 25 |
| <b>Figure S14.</b> Sequence alignment of the randomly picked clones from the bamboo shark vNAR-phage display library that represent sequences have different CDR3, Related to Figure 3..... | 26 |
| <b>Supplementary Tables</b> .....                                                                                                                                                           | 27 |
| <b>Table S1.</b> Summary of the sequencing data from WGS libraries and Hi-C libraries, Related to Figure 1.....                                                                             | 27 |
| <b>Table S2.</b> Basic statistics of the assembled bamboo shark genome, Related to Figure 1. .                                                                                              | 27 |
| <b>Table S3.</b> Summary of the functional annotation of genes in bamboo shark genome, Related to Figure 1.....                                                                             | 27 |
| <b>Table S4.</b> Summary of the repeat content in bamboo shark genome, Related to Figure 1.                                                                                                 | 28 |
| <b>Table S5.</b> Summary of the TE content in three cartilaginous fishes and seven bony fishes, Related to Figure 1.....                                                                    | 28 |
| <b>Table S6.</b> Evaluation of the final gene set by using BUSCO, Related to Figure 1.....                                                                                                  | 29 |
| <b>Table S7.</b> Distribution of paralogous genes in the bamboo shark genome. The yellow highlighted numbers represent gene pairs more than 20, Related to Figure 2. ....                   | 29 |
| <b>Table S8.</b> Summary of conserved genes among six cartilaginous fishes distributed on each chromosome, Related to Figure 2. ....                                                        | 30 |
| <b>Table S9.</b> Enrichment analysis for genes in chromosomes 8, 37, 39, 41, 43, 44, 45, 46, 47,48,49, 50 and 51, Related to Figure 2.....                                                  | 32 |
| <b>Table S12.</b> List of MHC class II genes in analyzed species, Related to Figure 3.....                                                                                                  | 34 |
| <b>Table S13.</b> MHC class II fragments detected by using BLAST in the elephant shark genome, Related to Figure 3.....                                                                     | 36 |
| <b>Table S14.</b> Designed primers for amplifying vNARs, Related to Figure 3.....                                                                                                           | 37 |
| <b>Table S15.</b> Ancestral P2X gene found in amphioxus and ascidiacea genomes, Related to Figure 4.....                                                                                    | 37 |
| <b>Table S16.</b> Protein length of P2X genes in bony fishes and sea lamprey, Related to Figure 4.....                                                                                      | 38 |

## **Transparent Methods**

### **DNA, RNA extraction**

Fourteen tissue types including blood, eye, gill, heart, liver, muscle, spleen, stomach, dorsal fin, tail fin, pancreas, leptospira, 2 capsulogenous gland and 2 kidney samples were collected from a female bamboo shark individual. Genomic DNA was extracted from one blood sample using the phenol-chloroform method and its quality and quantity were assessed by pulsed field gel electrophoresis and Qubit Fluorometer. 14 RNAs from these 14 tissue types were extracted by using TRIzol<sup>®</sup> Reagent and were assessed by Agilent 2100 bioanalyzer system.

### **Library construction**

Firstly, for WGS libraries with average insert sizes of 180 bp and 350 bp, a Covaris E220 ultrasonicator (Covaris, Brighton, UK) was used to shear the extracted high-quality DNA and AMPure XP beads (Agencourt, Beverly, USA) were used to select target fragments. Then, fragment end-repairing and A-tailing were performed by T4 DNA polymerase, T4 polynucleotide kinase and rTaq DNA polymerase. Next, PCR amplification of eight cycles was carried out and the single-strand circularization process was performed using T4 DNA Ligase, generating a single-stranded circular DNA library for sequencing.

Secondly, for mate-pair libraries, a Covaris E220 was used to acquire ~2 kb DNA fragments and Hydroshear (GeneMachines, CA, USA) was used to acquire ~5 kb, ~10 kb and ~20 kb DNA fragments. After further selection and purification of DNA, fragments were end-repaired and biotin-labeled. The modified fragments were circularized and re-fragmented using a Covaris E220. Biotin-labeled DNA fragments were captured on M280 streptavidin beads (Invitrogen, CA, USA), end-repaired, A-tailed and adaptor-ligated. Biotin-labeled fragments were PCR-amplified, purified on streptavidin-coated magnetic beads, size-selected by agarose gel

electrophoresis and column purification, single-stranded and re-circularized. The purified PCR products were heat-denatured together with an adapter that was a reverse-complement to a particular strand of the PCR product, and the single-stranded molecule was then ligated using DNA ligase to get a single-stranded circular DNA library.

Thirdly, a blood sample was used for constructing the Hi-C library. The fresh blood cells ( $5 \times 10^6$ ) were collected by centrifugation and re-suspended in 1 ml of 1x PBS by repetitive pipetting. The cells were cross-linked by adding 37% formaldehyde (SIGMA, USA) to obtain a 1% final concentration, to which was added a 2.5M glycine solution (SIGMA, USA) to a final concentration of 0.2M to quench the reaction. To prepare nuclei, the formaldehyde-fixed powder was resuspended in nuclei isolation buffer (10 mM Tris-HCl pH 8.0 (SIGMA, USA), 10 mM NaCl (BEYOTIME, Shanghai, China), 1× PMSF (SIGMA, St. Louis, USA)) and then incubated in 0.5% SDS for 10 min at 62 °C. SDS was immediately quenched with 10% Triton X-100 (SIGMA, St. Louis, USA) and the nuclei were collected by brief centrifugation. DNA was digested by restriction enzyme (Mbo I) (NEB, Ipswich, USA) and the 5' overhang was repaired using a biotinylated residue (0.4 mM biotin-14-Datp (INVITROGEN, USA)). The resulting blunt-end fragments were ligated in situ (10X NEB T4 DNA ligase buffer (NEB, Ipswich, USA), 10% Triton X-100 (SIGMA, St. Louis, USA), 10 mg/ml BSA (NEB, Ipswich, USA), T4 DNA ligase (NEB, Ipswich, USA)). Finally, the isolated DNA was reverse-crosslinked (adding 10 mg/ml proteinase K (NEB, Ipswich, USA) and 1% SDS (AMBION, Waltham, USA) to the tube followed by incubation at 56°C overnight) and purified (by putting the reverse-crosslinked DNA liquid into three tubes equally, adding 1.5× volumes of AMPure XP (AGENCOURT, Brea, USA) mixture to each tube, vortexing and spinning down briefly, incubating for 10 min. at room temperature, placing on the MPS (INVITROGEN, Waltham, USA) for 5 min. at room temperature, discarding supernatant, washing the beads twice with 1 ml of freshly made 75% ethanol (SINOPHARM, Shanghai, China), air-drying the beads completely and resuspending

the beads in 30  $\mu$ l of ddH<sub>2</sub>O). The Hi-C library was created by shearing 20  $\mu$ g of DNA and capturing the biotin-containing fragments on streptavidin-coated beads using Dynabeads MyOne Streptavidin T1 (INVITROGEN, Waltham, USA). Then DNA fragments were end-repaired and adaptor ligation was performed. After PCR (95°C 3 min.; [98°C 20 sec., 60°C 15 sec., 72°C 15 sec.] (8 cycles); 72°C 10 min.), the standard circularization step required for the BGISEQ-500 platform was carried out and DNBs were prepared as previously described. Fourthly, for RNA library construction, mRNA was extracted from different tissues using TRIzol<sup>®</sup> Reagent, fragmented, and then reverse-transcribed into cDNA by using Hiscript II Reverse Transcriptase (Vazyme Biotech, Nanjing City, P.R. China). Then, all single-stranded circular DNA libraries were constructed by using the same strategy described as above.

Last, the stLFR library was constructed by its standard protocol that was published recently (Wang et al., 2019).

### **Sequencing for all libraries**

All sequencing data were generated using the BGISEQ-500 platform. Libraries with an average insert size of 180 bp and 350 bp were sequenced yielding paired-end reads with 100 bp in length. Mate-pair libraries with average insert sizes of 2k, 5k, 10k and 20k and Hi-C library were sequenced yielding reads with 50 bp in length. RNA libraries were sequenced yielding paired-end reads with 100 bp in length. StLFR reads was also sequenced generating paired-end reads with 100 bp in length.

### **Genome assembly and annotation**

Firstly, we filtered raw sequencing data by discarding low-quality reads (defined as >10% bases with quality values less than 10 and >5% unidentified (N) bases), adaptor-contaminated reads and PCR duplicate reads. We trimmed a few bases at the start and end of reads according to the FastQC (v0.11.2) (Andrews and FastQC, 2015) results. Secondly, we randomly selected about 40X clean reads to carry out k-mer analysis to estimate the

genome size. Thirdly, we used Platanus (v1.2.4) (Kajitani et al., 2014) to perform the initial assembly with WGS clean data with parameters “assemble -k 29 -u 0.2, scaffold -l 3 -u 0.2 -v 32 -s 32 and gap\_close -s 34 -k 32 -d 5000”. We filled gaps using KGF (v1.19) and GapCloser (v1.10) (Luo et al., 2012) with default parameters. Fourthly, to obtain a chromosome-level genome, HIC-Pro (v2.8.0) (Servant et al., 2015) was used for quality control of Hi-C sequencing data with parameters [BOWTIE2\_GLOBAL\_OPTIONS = --very-sensitive -L 30 --score-min L,-0.6,-0.2 --end-to-end -reorder;BOWTIE2\_LOCAL\_OPTIONS = --very-sensitive -L 20 --score-min L,-0.6,-0.2 --end-to-end -reorder; IGATION\_SITE = GATC; MIN\_FRAG\_SIZE = 100; MAX\_FRAG\_SIZE = 100000; MIN\_INSERT\_SIZE = 50; MAX\_INSERT\_SIZE = 1500]. Finally, the software packages Juicer (Durand et al., 2016) and 3d-dna (v170123) (Dudchenko et al., 2017) were employed to generate contact matrices of chromatin and constructed chromosomes with parameter [-m haploid -s 4 -c 5] based on the karyotype information supplied previously (MA et al., 2008).

After obtaining the final chromosome-level genome, we proceeded with genome annotation including repeat contents, gene models and gene function. For repeat section, both homolog-based and *de novo* prediction strategies were carried out. In detail, RepeatMasker (v 4.0.5) (Tarailo - Graovac and Chen, 2009) and RepeatProteinMasker (v 4.0.5) (Tarailo - Graovac and Chen, 2009) were used to detect interspersed repeats and low complexity sequences against the Repbase database (Jurka et al., 2005) at the nuclear and protein levels, respectively. Then RepeatMasker was further used to detect species-specific repeat elements using a custom database generated by RepeatModeler (v1.0.8) and LTR-FINDER (v1.0.6) (Xu and Wang, 2007). In addition, Tandem Repeat Finder (v4.0.7) (Benson, 1999) was dispatched to predict tandem repeats. The final repeat content result was integrated using in-house scripts. Before gene model construction, we masked the repeat sequences because of their negative effect on gene model prediction. We downloaded protein sets of 13 species



including *Homo sapiens*, *Mus musculus*, *Gallus gallus*, *Xenopus tropicalis*, *Ornithorhynchus anatinus*, *Danio rerio*, *Oryzias latipes*, *Strongylocentrotus purpuratus*, *Ciona intestinalis*, *Rhincodon typus* and *Callorhinchus milii* from RefSeq (release 82), *Petromyzon marinus* from Ensembl (release 84) and *Branchiostoma floridae* from JGI Genome Portal (<http://genome.jgi-psf.org/Brafl1/Brafl1.home.html>) and aligned them to the masked genome with BLAT(Kent, 2002) to identify positive match regions. GeneWise (v2.2.0) (Birney et al., 2004) was then used to do accurate alignments for target regions and to predict homolog-based gene models.

Transcriptome reads from 14 tissues including blood, eye, gill, heart, liver, muscle, spleen, stomach, dorsal fin, tail fin, pancreas, leptospira, 2 capsulogenous gland and 2 kidney samples were mapped to the genome with HISAT2 (Pertea et al., 2016) and StringTie (Pertea et al., 2016) was used to assemble gene transcripts.

TransDecoder (Haas et al., 2013) was then used to predict the candidate complete ORFs. Further, for *de novo* gene prediction, we employed AUGUSTUS (v3.1) (Stanke et al., 2006) to scan the whole genome with a custom training set generated by using 2,000 high quality genes. Subsequently, we combined the homology-based and *de novo*-predicted gene sets using GLEAN (Elsik et al., 2007) and integrated the GLEAN and transcriptome results with in-house scripts to generate a representative and non-redundant gene set. The final gene set was assigned with a potential function by aligning proteins to databases including KEGG, Swissprot, TrEMBL and InterPro.

### **Construction of phylogenetic tree**

To infer phylogenetic tree of bamboo shark, we selected other five published shark genome including elephant shark (2014), whale shark (2017), brownbanded bamboo shark (2018), cloudy catshark (2018) and white shark (2019), five representative bony fishes including four ray-finned fishes and one lobe-finned fish as well as human to identify single copy orthologous genes. we used TreeFam (Li et al., 2006), defining 33,306 gene families

including 823 single copy orthologous genes. Based on coding sequences of these 823 genes, we constructed trees using both Maximum-likelihood and Bayesian methods with GTR+gamma model, which generated identical trees. Next we estimated divergence time of important branches using PAML mcmctree programme (Yang, 2007; Yang and Rannala, 2006) with the approximate likelihood calculation method.

### **Evolution of chromosomes**

For ancestral chromosomes construction, we identified paralogous genes and orthologous genes by using criteria defined by *Salse et al* (Salse et al., 2009) with both Cumulative Identity Percentage (CIP) and Cumulative Alignment Length Percentage (CALP) value of 0.5 and selected genes pairs defined as A match B best and B match A best. Then MCSCAN(Tang et al., 2008) was used to generate synteny blocks with default parameters. We first noted 54 shared duplications (with 414 paralogous gene pairs) on all the chromosomes. After further integration of these duplications and gene pairs, we found 16 duplicated chromosome pairs and 5 single chromosomes. For identification of conserved genes among bamboo shark, elephant shark, whale shark, brownbanded bamboo shark, cloudy catshark and white shark, spot gar, and medaka, the same criteria with both CIP and CALP value of 0.3 were used. The best hit of multiple matches was selected. Ks values of single copy genes were calculated by KaKs Calculator with default parameter. Heterozygosity of each chromosome was calculated by calling heterozygous SNPs generated by BWA (Li and Durbin, 2009) and SAMtools package (Li, 2011).

### **MHC genes and P2X gene family analysis**

We downloaded coding sequences (CDS) and proteins of *Callorhinchus milii* (NCBI Accession:

GCF\_000165045.1), *Rhincodon typus* (NCBI Accession: GCF\_001642345.1), *Fugu rubripes* (NCBI Accession: GCF\_000180615.1) and *Larimichthys crocea* (NCBI Accession: GCF\_000972845.1) from NCBI database, and

*Danio rerio*, *Latimeria chalumnae*, *Oryzias latipes* and *Gasterosteus aculeatus* from Ensembl database (release 84), and sea lamprey from (<https://genomes.stowers.org/organism/Petromyzon/marinus>) and *Branchiostoma floridae* from JGI Genome Portal (<http://genome.jgi-psf.org/Brafl1/Brafl1.home.html>). Next we carried out initial filtering by discarding sequences less than 30 amino acids and kept the longest transcript if one gene contains multiple transcripts. Subsequently, gene function annotation of these gene sets was performed by using the same method to bamboo shark by using BLAST(Altschul et al., 1990). Then we summarized the MHC genes and P2X gene families by integrating the above information. The P2X-like genes were searched against NCBI database.

### **Identification of IgNAR**

We downloaded IgNAR (immunoglobulin new antigen receptor from cartilaginous) nucleotide sequences from NCBI database and then aligned these sequences to the bamboo shark genome by using BLAST (v2.2.26)(Altschul et al., 1990) with parameters “-F F -m 8 -e 1e-05” to get high scoring pairs (HSPs). Then we clustered the HSPs by integrating the overlaps between HSPs to verify the IgNAR loci. To further verify the IgNAR loci, we re-assembled this region by using single tube long fragment reads (stLFR). Firstly, we mapped the stLFR reads to our initial IgNAR region using BWA (Li and Durbin, 2009) and selected these reads. Then we extracted all reads that were marked with the same barcodes as the mapped reads. Finally, we used Supernova (v2.1.1)(Mohr et al., 2017) to assemble these reads and got the re-assembled IgNAR region with default parameters.

### **Bamboo shark vNAR phage display library construction**

Five bamboo shark individuals (3 male and 2 female, with body length ranging from ~31.50-39.37 inch) were bled and dissected out for spleen, which were submerged in RNAlater for subsequent storage at -80°C. Total

RNA was isolated using the TRIzol reagent (Thermo Fisher Scientific) according to the manufacturer's instruction. We reverse-transcribed RNA into cDNA in a total of 20µl volume with the SuperScript III First-Strand Synthesis System (Thermo Fisher Scientific) according to the manufacturer's instruction. Based on the IgNAR sequences of bamboo shark, we designed and synthesized four pairs of primers for four types of the vNAR domain to amplify the vNAR sequence from the cDNA product by PCR. All reactions were pooled on 1.5% TAE agarose gel and purified by QIAEX II Gel Extraction kit 500 (Qiagen). Purified PCR products and pMECS vector were digested by restriction enzyme Pst I and Not I (NEB). The digested PCR products and vector were purified by QIAEX II Gel Extraction kit 500 (Qiagen). Then the PCR products were inserted into the pMECS vector at a molar ratio of 3:1 using T4 ligase (NEB). Ligation products were purified and transformed into electrocompetent TG1 cells (Lucigen Corporation). The TG1 cells were stored at -80°C by addition of glycerol to a final concentration of 15% (v/v).

### **Bamboo shark vNAR phage display library screening**

Nonadjacent wells of a Maxisorp 96-well were coated with 100µl of 5µg/ml human recombinant antigen Ki67, CD64 and YKL40 (Sino Biological). The plate was sealed by microplate sealing tape and was incubated overnight at 4°C. The following morning, the antigen-coated wells were washed three times with 200µl of PBST, then 200µl blocking solution of 0.5% BSA (Genview) was added in the plate which was incubated for 2h on a vibrating platform at RT. After the blocking solution removed from the antigen-coated wells, the plate was washed five times with 200µl of PBST. For each antigen, 100µl rescued phage library were dispensed into both a selection and a control well. The plate was incubated for 2h on a vibrating platform, then washed five times with 200µl PBST. 100µl triethylamine (1.4% v/v) was added into each selection well and control well for 15min at RT to elute phage bound on the wells. The phage solution was neutralized by 100µl of 1M Tris-HCl (pH 7.4).

The rescued phage were titrated to estimate the number by sequentially mixing 10 $\mu$ l of the phage into 90 $\mu$ l of LB to 10<sup>6</sup> fold in a low-binding 96-well plate. 10<sup>2</sup> and 10<sup>3</sup> fold infected TG1 were spread onto the other solid selective medium for single colonies.

### **Phage ELISA**

96 individual clones per target in total were picked at 24 candidates per round and inoculated into wells of a 96-deep-well plate with 500  $\mu$ l 2TY containing 100  $\mu$ g/ml ampicillin and 2% glucose for 3h at 37 $^{\circ}$ C and 180rpm. Sufficient volume of M13KO7 helper phage (1 $\mu$ l) were added into each well at 37 $^{\circ}$ C with shaking overnight. The plate was centrifugated at 3200rpm for 10min, and the supernatant was transferred to a clean 96-deep-well plate for ELISA. The antigens were used to coat a 96 well plate at 2 $\mu$ g/ml in PBS buffer, 100 $\mu$ l/well, at 4 $^{\circ}$ C overnight. The antigen-coated wells were washed three times with 200 $\mu$ l of PBST, then 200 $\mu$ l blocking solution of 0.5% BSA was added in the plate which was incubated for 2h on a vibrating platform at RT. The each well supernatant of the deep-well plate were added into antigen-coated well and control well, respectively. The ELISA plate was incubated for 2h at RT, and then washed five times with 200 $\mu$ l of PBST. Binding was detected by HRP conjugated mouse anti-M13 antibody(Sino Biological) at 1:5000 concentration and read at 450 nm with a microplate reader Mutiskan Go (Thermo Fisher Scientific).

## Supplementary Figures

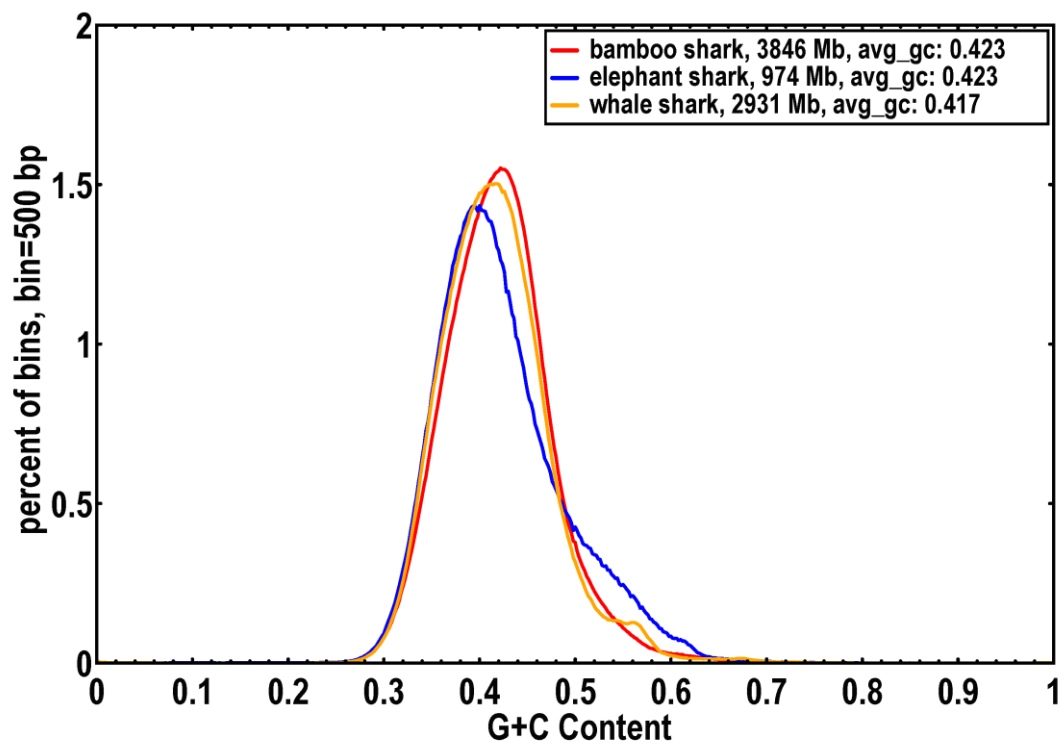

**Figure S1.** GC content of the assembled bamboo shark, elephant shark, and whale shark genomes, Related to Figure 1.

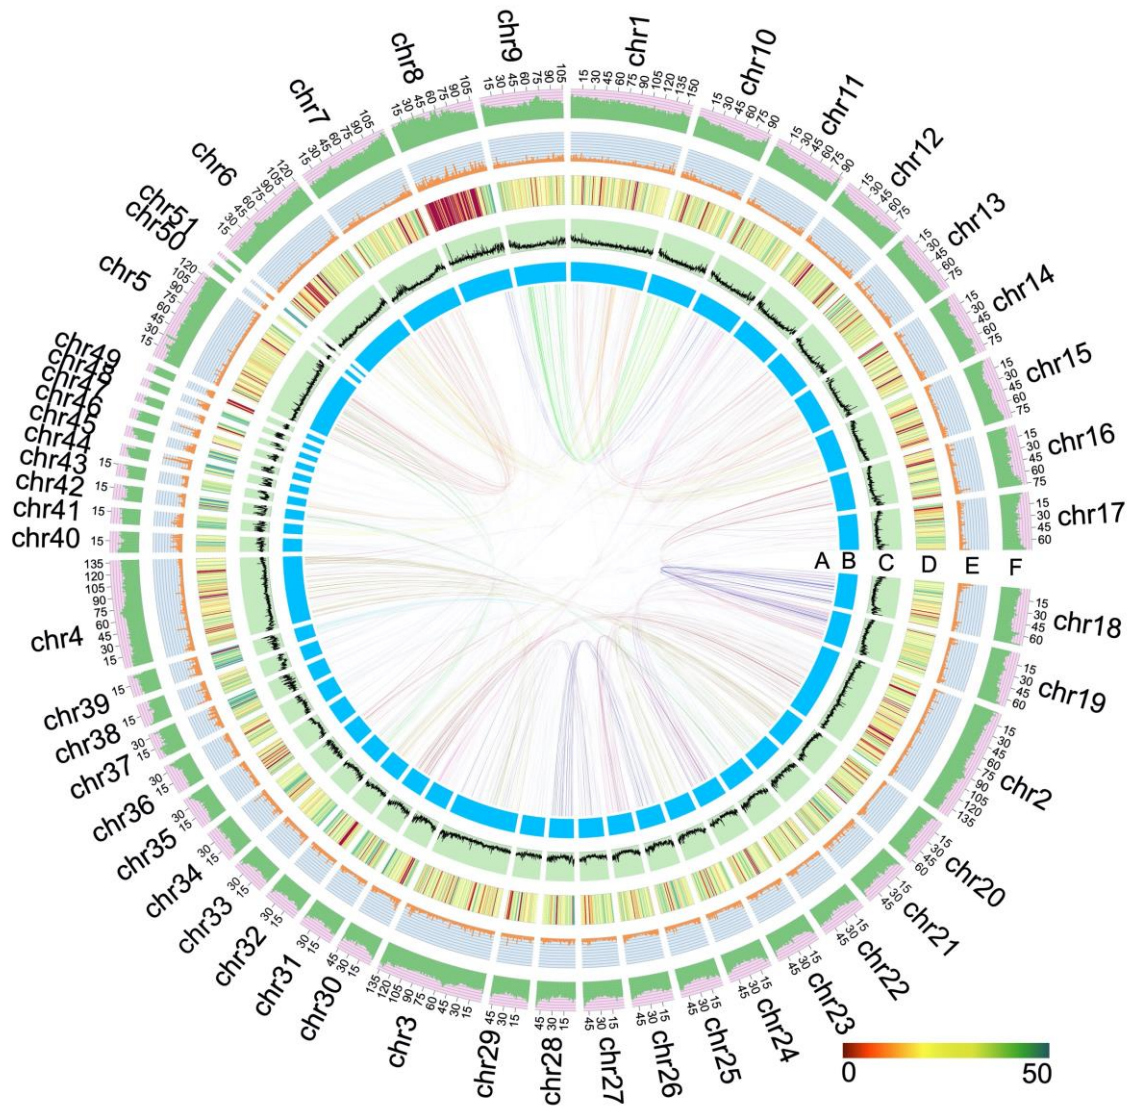

**Figure S2.** Circos plot of the genomic landscape, Related to Figure 1.

**A**, Paralogous gene pairs of 51 chromosomes. **B**, 51 chromosomes of the assembled genome. **C**, GC content of the assembled genome at 100kb windows. **D**, gene density per Mb on each chromosome. **E**, histogram of DNA transposon ratios. **F**, histogram of retrotransposon ratios.



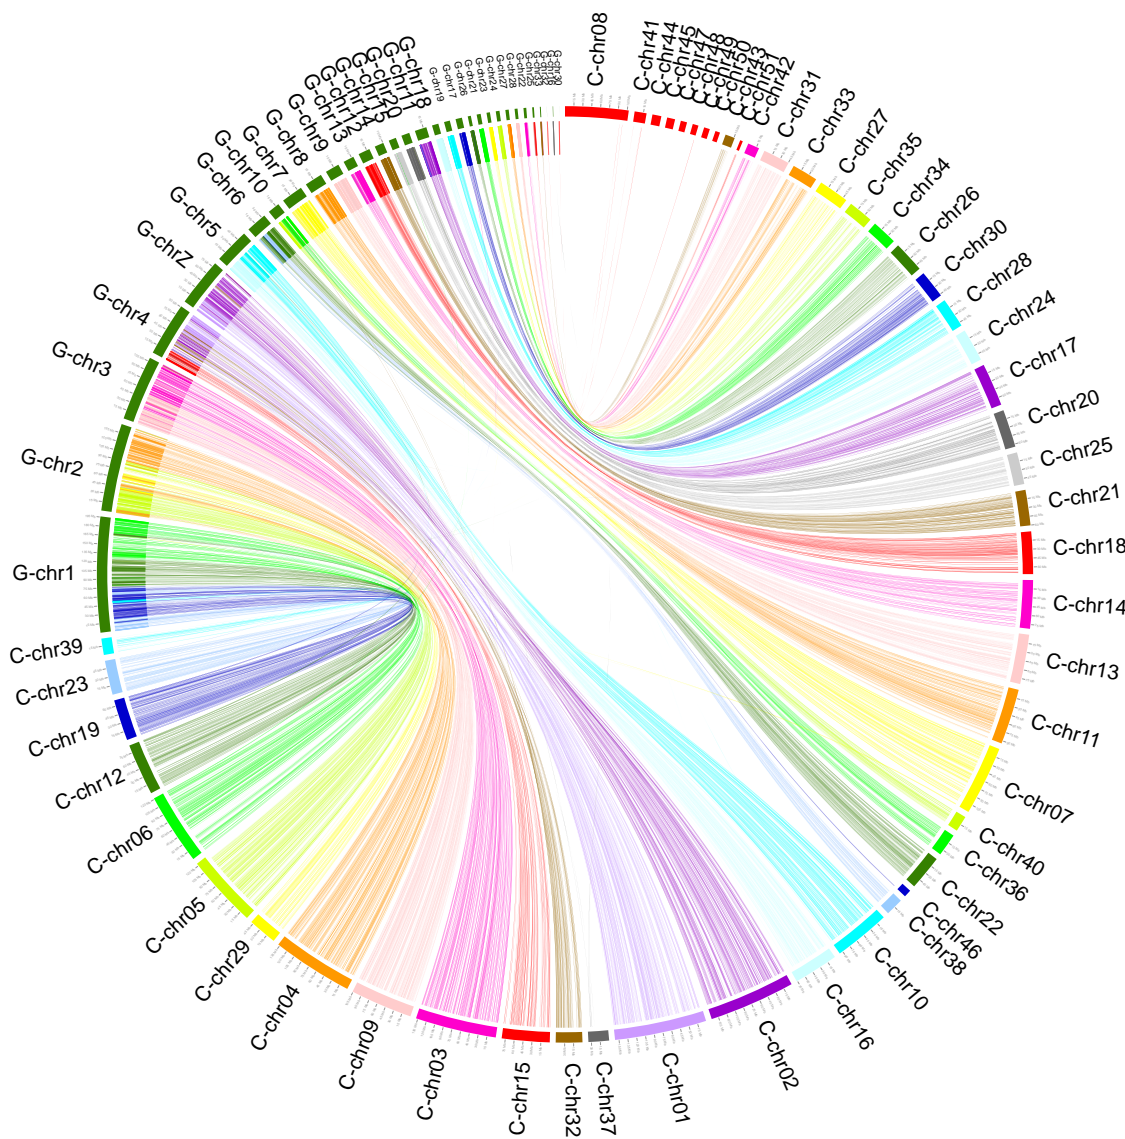

**Figure S3.** Circos plot of comparisons between bamboo shark and chicken, Related to Figure 1.

G-chr and C-chr represent chicken and bamboo shark chromosomes, respectively. The lines represent gene pairs identified with both CIP and CALP (defined by *Salse et al (Salse et al., 2009)*) value of 0.3.



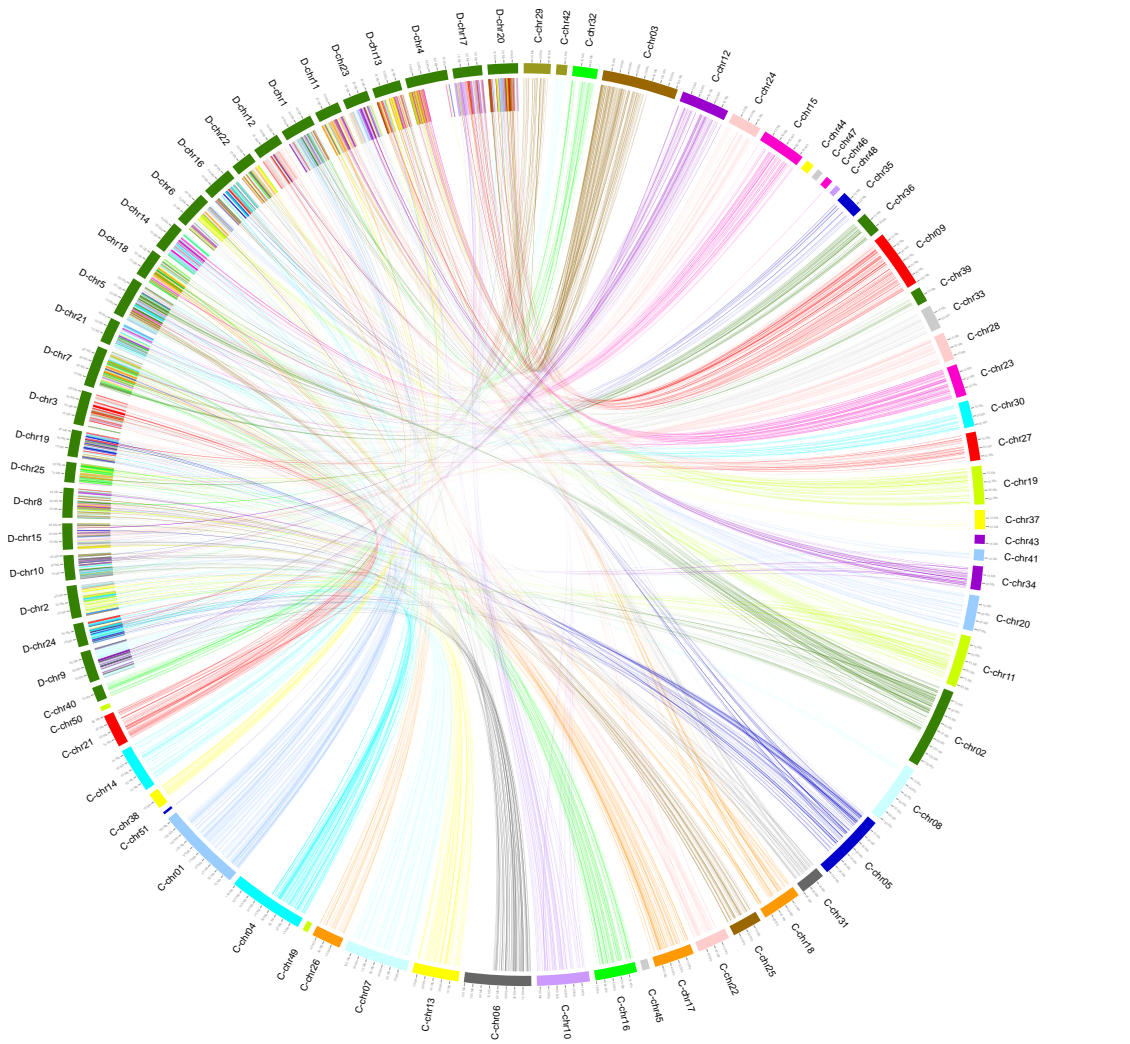

**Figure S4.** Synteny relationship of bamboo shark and zebrafish, Related to Figure 1.

D-chr and C-chr represent zebrafish and bamboo shark chromosomes, respectively. The lines represent gene pairs identified with both CIP and CALP (defined by *Salse et al (Salse et al., 2009)*) value of 0.3.

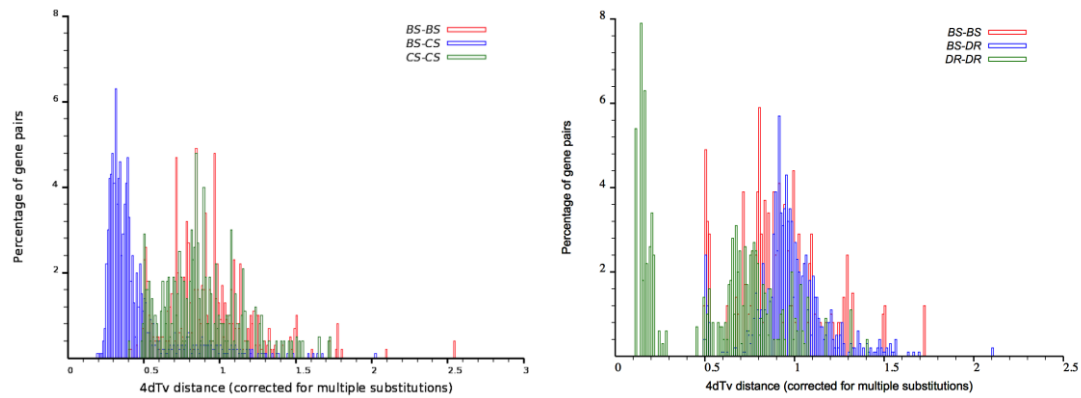

**Figure S5.** Whole genome duplication in elephant shark, bamboo shark and zebra fish genomes as revealed through 4DTV analyses, Related to Figure 1.

We took zebra fish (DR), elephant shark (CS) and bamboo shark (BS) as examples, detected gene pair blocks by using Mscan and calculated 4DTV values of gene pairs. From the figure we can clearly see that zebra fish has one extra WGD also supported by seven HOX gene clusters (the third WGD event). But in the elephant shark and bamboo shark genomes, we only detected one peak (the second WGD event) which indicates that the first WGD event cannot be detected possibly due to too old WGD event (too high divergence of the paralogous gene pairs) and only can be detected by some conserved genes (for example, HOX genes).

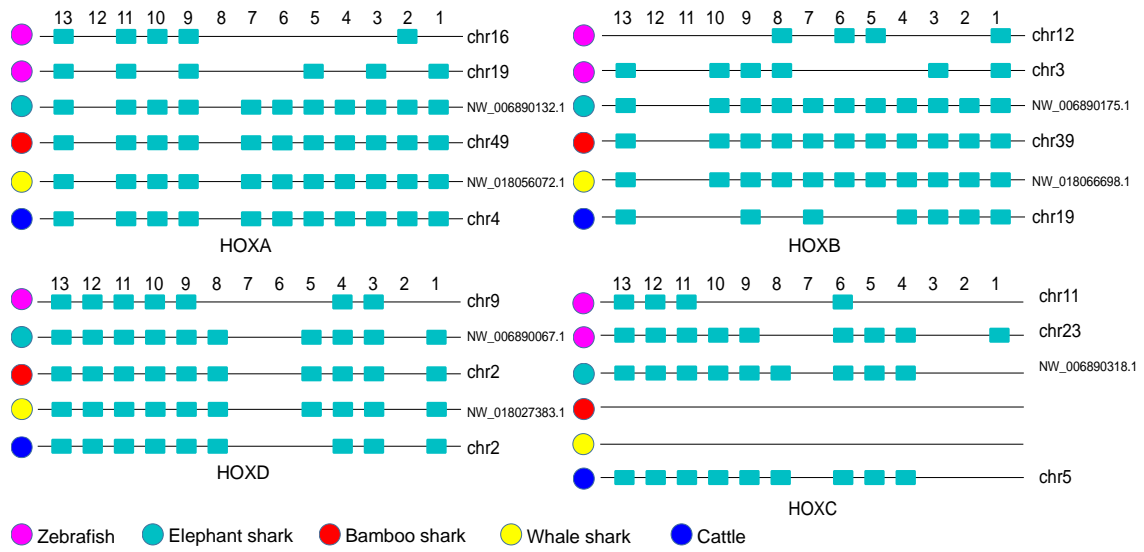

**Figure S6.** HOX gene clusters identified in five species, Related to Figure 1.

We identified four HOX gene clusters in elephant shark, three in bamboo shark and whale shark (HOXC lost) which suggest sharks have only two rounds of WGD events.

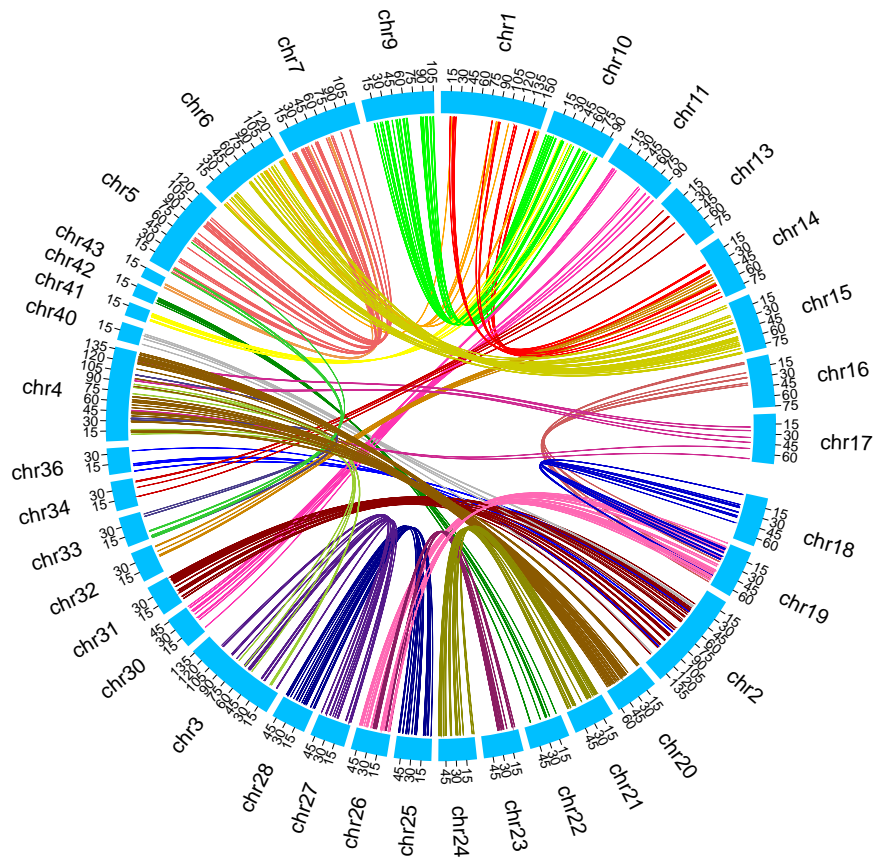

**Figure S7.** Distribution of shared paralogous genes of bamboo shark and elephant shark, Related to Figure 2.

The lines represent gene pairs obtained by using blastp with both CIP and CALP (defined by *Salse et al*(*Salse et al., 2009*)) value of 0.5.

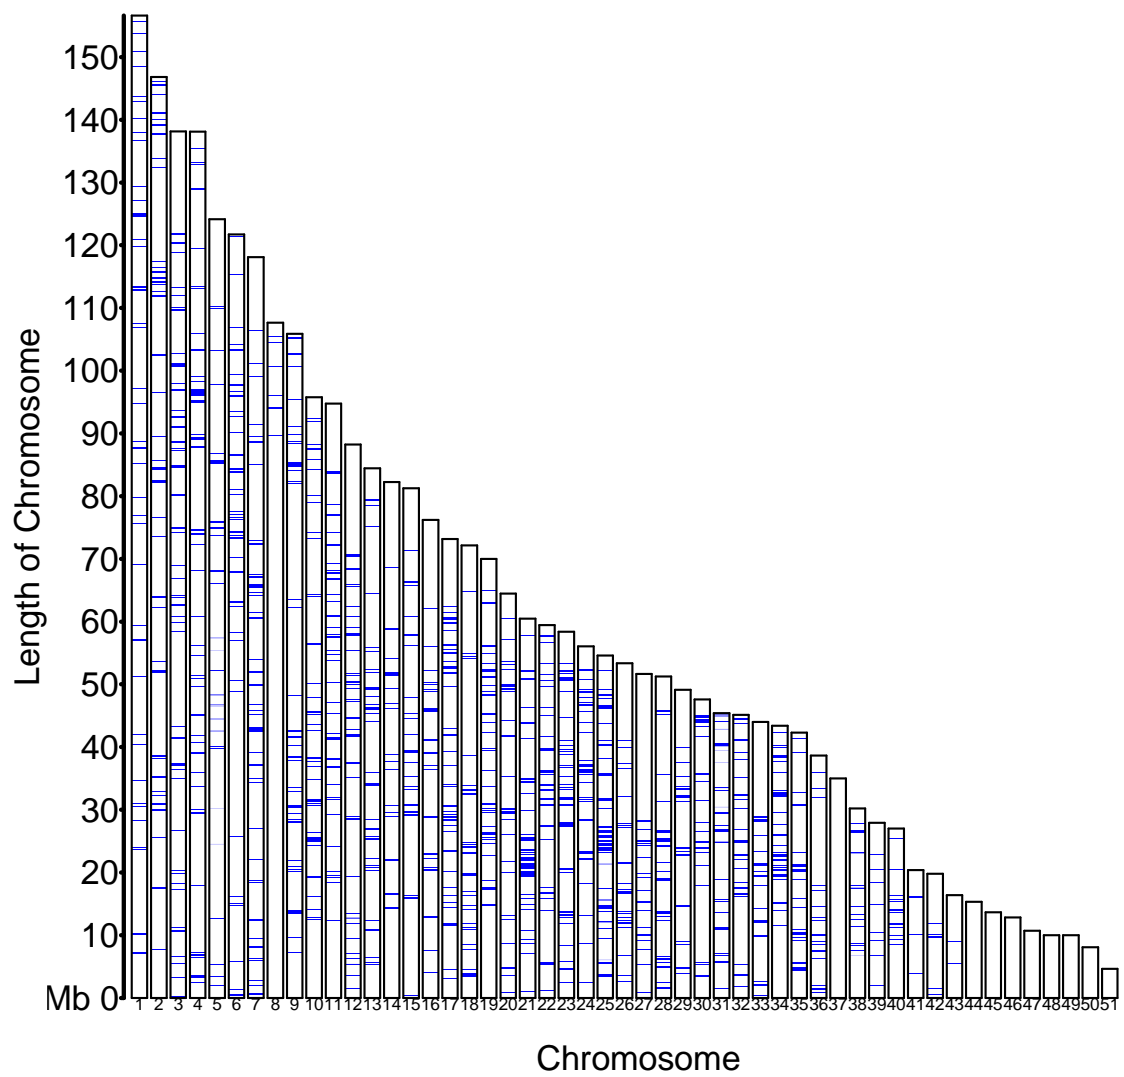

**Figure S8.** Distributions of conserved regions of six cartilaginous fishes (bamboo shark, elephant shark, whale shark, brownbanded bamboo shark, cloudy catshark and white shark) on 51 chromosomes of the bamboo shark, Related to Figure 2.

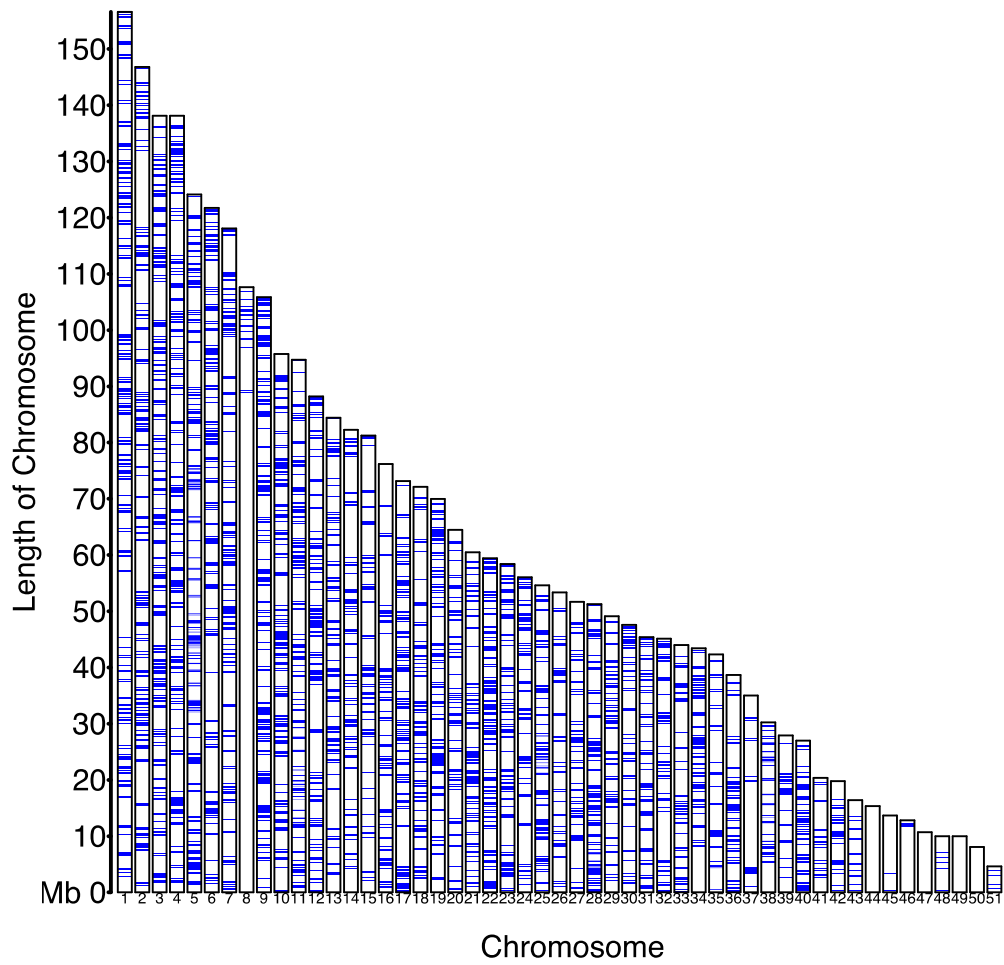

**Figure S9.** Distributions of conserved regions between bamboo shark and medaka on 51 chromosomes of the bamboo shark, Related to Figure 2.

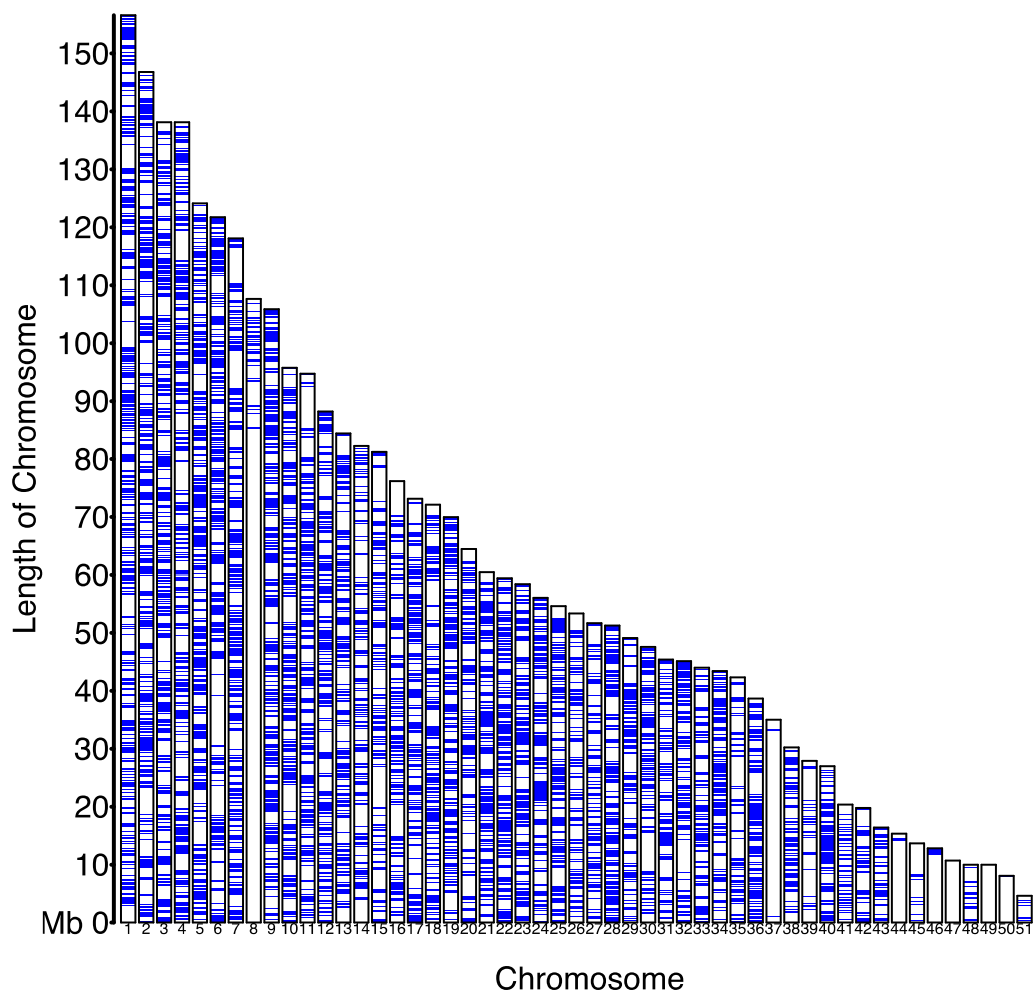

**Figure S10.** Distributions of conserved regions between bamboo shark and spotted gar on 51 chromosomes of the bamboo shark, Related to Figure 2.

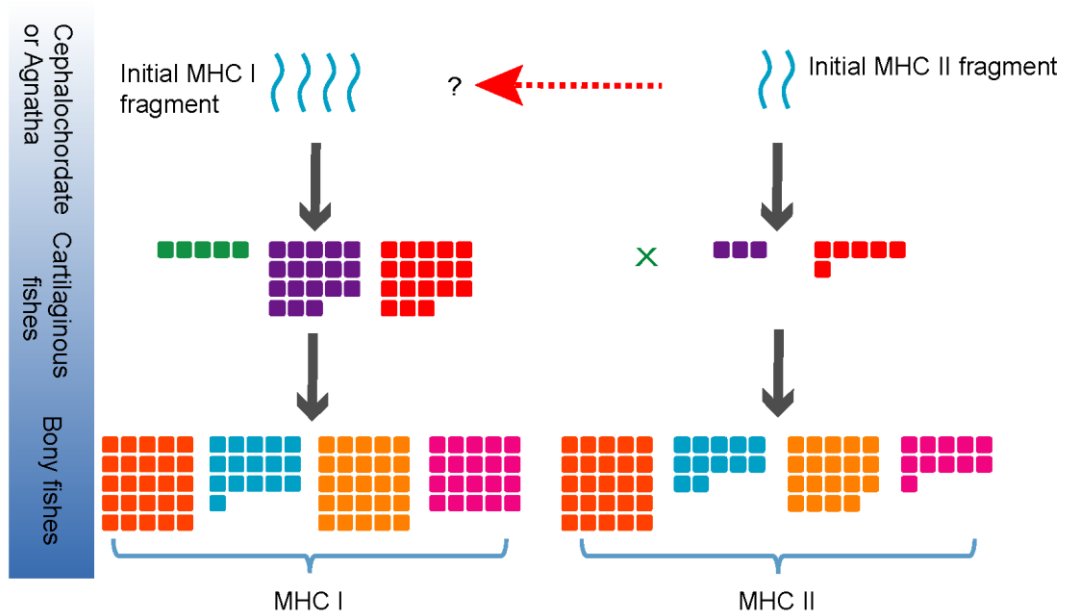

**Figure S11.** Hypothetical model of MHC genes evolution, Related to Figure 3.

The square numbers represent gene numbers. Green, elephant shark. Purple, whale shark. Red, bamboo shark. Orange, zebrafish. Blue, medaka. Yellow, coelacanth, magenta, three-spined sticklebacks. The green X mark represents there are no MHC class II genes found in the elephant shark genome. The red arrow and question mark represent the hypothesis that MHC class I molecules may be derived from MHC class II while more researches should be done in the future.



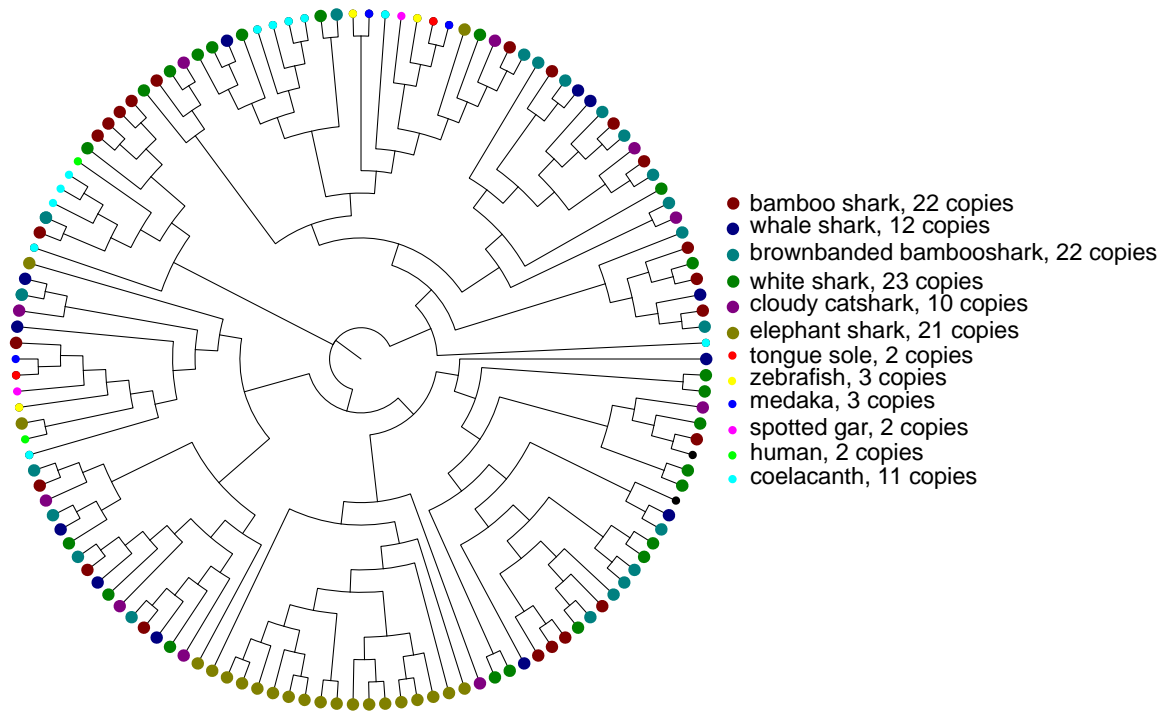

**Figure S12.** Gene tree of *TRIM69*, Related to Figure 3.

This tree was constructed with protein sequences of these genes by using software of MUSCLE (v3.8.31) (Edgar, 2004) and FastTree (v2.1.10) (Price et al., 2010).

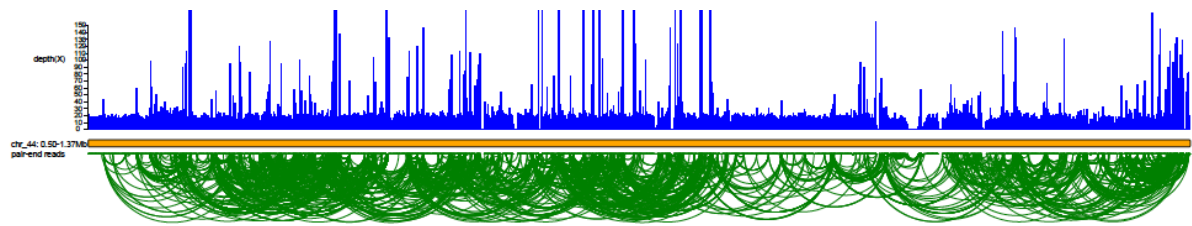

**Figure S13.** Re-assembled IgNAR region supported by paired-end reads, Related to Figure 3.

All of the non-N bases were supported by reads with average depth of ~33 times. The blue histogram represents sequencing depth of this region. The green curves represent relationship of pair-end reads.

```

1-1-C11 QTPRTITKEAGESLTIINVLKDALFALSSTIYWYLTKLKDATKRDRIISIGGRYSETVNGKSKSFSFLRLRDLRVEDSGAYHCEA-----ETA---AP-----R-----YHE-GRGTF
1-1-F11 QTPKTIIRGATESLTIINVLKDPYSYAFSTIYWYLTKLKDATNKESMSISIGGRYSETVNGKSKSFSFLRITDLRVEDSGTYHCEA-----C---DGYVTRNTWS--E-GSGTI
1-1-B12 QTPRTIITKEIGESLTIINVLKDASYALSSTIYWYLTKLKDATKWDRIISIGGRYSETVNGKSKSFSFLRLRDLRVEDSGAYHCEA-Y--AG-TAAMT-VC-----C---DGYVTRNTWS--E-GSGTI
1-1-G10 QTPRTIITKETGESLTIINVLKDASYALSSTIYWYLTKLKDATKWDRIISIGGRYSETVNGKSKSFSFLRLRDLRVEDSGAYHCEA-Y--GG-----C---DRGG-Y-----YHE-GRGTF
1-1-H12 QTPRTIITKETGESLTIINVLKDASYALSSTIYWYLTKLKDATKWDRIISIGGRYSETVNGKSKSFSFLRLRDLRVEDSGAYHCEA-YV-----C---TAA-IARAN-----YHE-GRGTF
2-0-4 QTPRTIITKETGESLTIINVLKDASYALSSTIYWYLTKLKDATKWDRIISIGGRYSETVNGKSKSFSFLRLRDLRVEDSGAYHCEA-Y--GG-----C---DGGG-Y-----YHE-GRGTF
2-0-6 QTPRTIITKEAGESLTIINVLKDPYSALSSTIYWYLTKLKDATKGDRIISIGGRYSETVSRGSKSFSFLRLRDLRVEDSGAYHCEA-YV-ALYS-----C---ED-----R-YHE-GRGTF
2-0-33 QTPRTIITKETGESLTIINVLKDASYALSSTIYWYLTKLKDATKWDRIISIGGRYSETVNGKSKSFSFLRLRDLRVEDSGAYHCEA-YV-GD-S-----C---EDW-----YHE-GRGTF
1-2-2 QKPRSAITSGESLTIINVLRDVNVGLYSTIDWYWKLGSTNEESISTSERVSVNKGSLKSFSLRISDLRVEDSGTYHCEA-----DDMT--GHS-----LFYVQKSGSTV
2-0-24 QTPRTIITKETGESLTIINVLKGAQVALSSTIYWYLTKLKDATKWDRIISIGGRYSETVNGKSKSFSFLRLRDLRVEDIGVYHCEAND-DDR-----S-----YHE-GRGTF
2-0-5 QTPRTIITKEAGESLTIINVLKGSSTALDSTIYWFYFKKGATKKEASLSTIGGRYSETVNGKSKSFSFLRISDLRVEDSGTYHCEA-YS-SQLGWVSWN-----D---E-GGGTI
1-1-G12 QTPRTIITKEAGESLTIINVLKGSSTALDSTIYWFYFKKGATKKEASLSTIGGRYSETVNGKSKSFSFLRISDLRVEDSGTYHCEA-Y-----TPL---WNP-----D---YHE-GRGTF
2-0-2 QTPRTIITKEAGESLTIINVLKGSSTALDSTIYWFYFKKGATKKEASLSTIGGRYSDTKNTASKSFSFLRISDLRVEDSGTYHCEA-YARD--SWDDL---RGR-----N-GI---E-GGGTI
2-0-8 QTPRTIITKETGESLTIINVLKDSSTALDNTIYWFYFKKGATKKEASLSTIGGRYAETVKNKASKSFSFLRIRDLRVEDSGTYHCEA-YSRVAFD-----LTRR-----SVE-GGSI
2-0-10 QTPRTIITKEAGESLTIINVLKDSSTALDSTIYWFYFKKGATKKEASLSTIGGRYAETVKNKASKSFSFLRISDLRVEDSGTYHCEA--S-GRHSWVR---YTP--GMSY--I---E-GGGTI
2-0-11 QTPRTIITKEAGESLTIINVLKDSSTALDSTHWYFKEDATKKEASLSTIGGRYAETVKNKASKSFSFLRISDLRVEDSGTYHCEA-YSWDVVRHWN---R-D-----I---E-GGGTI
2-0-17 QTPRTIITKEAGESLTIINVLKGSSTALDSTIYWFYFKKGATKKEASLSTIGGRYSDTKNTASKSFSFLRISDLRVEDSGTYHCEA-Y----TAG---TGN--SWS--S-YSE-AGGTI
2-0-26 QTPRTIITKEAGESLTIINVLKGSSTALDSTIYWFYFKKGATKKEASLSTIGGRYSDTKNTASKSFSFLRISDLRVEDSGTYHCEALY-----C---SDLG-----I---E-GGGTI
2-0-29 QTPRTIITKEAGESLTIINVLKRSNIALRSTIYWFYFKKGATKKEASLSTIGGRYSDTKNTASKSFSFLRISDLGVEDSGTYHCEA-Y-RWYDG-----Y---WRE-GGGTI
1-1-A11 QTPRTIITKEAGESLTIINVLKGSSTALDNTIYWFYFKKGATKKEASLSTIGGRYAETVKNKASKSFSFLRISDLRVEDSGTYHCEA-----RAAGTARGYSP-----Y---YHE-GRGTF
1-1-F10 QTPRTIITKEAGESLTIINVLKGSSTALDNTIYWFYFKKGATKKEASLSTIGGRYSDTKNTASKSFSFLRISDLRVEDSGTYHCEA-Y-R-RGWDERAY-----G-IG-----E-GGGTI
1-1-E11 QTPRTIITKEAGESLTIINVLKGSSTALDNTIYWFYFKKGATKKEASLSTIGGRYSDTKNTASKSFSFLRISDLRVEDSGTYHCEA-Y-RAQM-PLR-----C---DTSS--D--Y-E-GGGTI
1-1-G11 QTPRTIITKEAGESLTIINVLKGSSTALDNTIYWFYFKKGATKKEASLSTIGGRYSDTKNTASKSFSFLRISDLRVEDSGTYHCEA-Y-RGVYSWN-----C---E-GS--D-FK-E-GGGTI
1-1-C12 QTPRTIITKEAGESLTIINVLKDSSTALDNTIYWFYFKKGATKKEASLSTIGGRYAETVKNKASKSFSFLRISDLRVEDSGTYHCEAY-----GSA--GR--G-YHE-GRGTF
1-1-E12 QTPRTIITKEAGESLTIINVLKGSSTALDNTIYWFYFKKGATKKEASLSTIGGRYSDTKNTASKSFSFLRISDLRVEDSGTYHCEALYSRDD-----C---TINELGR-YD--YHE-GRGTF
2-0-9 QTPRTIITKEAGESLTIINVLKGSSTALDNTIYWFYFKKGATKKEASLSTIGGRYAETVKNKASKSFSFLRISDLRVEDSGTYHCEA-----AGMT---GVAIAGP-----YHE-GRGTF
2-0-15 QTPRTIITKEAGESLTIINVLKGSSTALDNTIYWFYFKKGATKKEASLSTIGGRYAETVKNKASKSFSFLRIIDL RVEDSGTYHCEA-----LE-----GT-RIAGL-----YHE-GRGTF
2-0-28 QTPRTIITKEAGESLTIINVLKGSSTALDNTIYWFYFKKGATKKEASLSTIGGRYAETVKNKASKSFSFLRISDLRVEDSGTYHCEA-----PHSWDA---GT-RIAGL-----IHYE-GRGTF
2-0-30 QTPRTIITKEAGESLTIINVLKGSSTALDNTIYWFYFKKGATKKEASLSTIGGRYAETVKNKASKSFSFLRISDLRVEDSGTYHCEA-----C---DSYVEFP-----HYE-GRGTF
2-0-31 QTPRTIITKEAGESLTIINVLKDSSTALDNTIYWFYFKKGATKKEASLSTIGGRYAETVKNKASKSFSFLRINLRSEERGTYHCEA-----RLGR--N-----RV-----P--D---YHE-GRGTF

```

**Figure S14.** Sequence alignment of the randomly picked clones from the bamboo shark vNAR-phage display library that represent sequences have different CDR3, Related to Figure 3.

The areas highlighted by yellow are the CDRs determined by IMGT database. The areas highlighted by red are the cysteines.

## Supplementary Tables

**Table S1.** Summary of the sequencing data from WGS libraries and Hi-C libraries, Related to Figure 1.

| Strategy | Insert    | Reads       | Total     |
|----------|-----------|-------------|-----------|
|          | Size (bp) | Length (bp) | Data (Gb) |
| WGS      | 170       | 100_100     | 383.98    |
|          | 350       | 100_100     | 387.24    |
|          | 2,000     | 50_50       | 65.36     |
|          | 5,000     | 50_50       | 142.20    |
|          | 10,000    | 50_50       | 71.34     |
|          | 20,000    | 50_50       | 57.56     |
| HIC      | \         | 50_50       | 71.95     |
| Total    | \         | \           | 1179.63   |

**Table S2.** Basic statistics of the assembled bamboo shark genome, Related to Figure 1.

|              | WGS           |               | HIC           |               |
|--------------|---------------|---------------|---------------|---------------|
|              | Contig (bp)   | Scaffold (bp) | Contig (bp)   | Scaffold (bp) |
| N90          | 1,473         | 2,360         | 1,415         | 2,218         |
| N80          | 9,471         | 172,678       | 8,377         | 20,708,781    |
| N70          | 18,406        | 430,414       | 17,000        | 44,175,687    |
| N60          | 27,604        | 684,074       | 25,851        | 49,995,320    |
| N50          | 37,247        | 962,547       | 35,451        | 57,918,702    |
| N40          | 48,650        | 1,251,191     | 46,889        | 71,834,548    |
| N30          | 62,981        | 1,595,392     | 60,770        | 80,155,495    |
| N20          | 82,569        | 2,081,779     | 80,154        | 93,009,420    |
| N10          | 115,410       | 2,827,051     | 112,378       | 99,330,644    |
| max_length   | 7,042,168     | 438,259       | 438,259       | 136,536,876   |
| Total length | 3,647,281,518 | 3,846,300,841 | 3,647,255,807 | 3,851,610,035 |

**Table S3.** Summary of the functional annotation of genes in bamboo shark genome, Related to Figure 1.

|              | Number | Percent (%) |
|--------------|--------|-------------|
| <b>Total</b> | 19,595 | 100         |

|                    |        |       |
|--------------------|--------|-------|
| <b>InterPro</b>    | 16,938 | 86.44 |
| <b>GO</b>          | 13,147 | 67.09 |
| <b>KEGG</b>        | 17,171 | 87.63 |
| <b>Swiss-Prot</b>  | 18,507 | 94.45 |
| <b>TrEMBL</b>      | 15,622 | 79.72 |
| <b>Annotated</b>   | 19,371 | 98.86 |
| <b>Unannotated</b> | 224    | 1.24  |

**Table S4.** Summary of the repeat content in bamboo shark genome, Related to Figure 1.

| <b>Type</b>         | <b>Repeat Size</b> | <b>% of genome</b> |
|---------------------|--------------------|--------------------|
| <b>Trf</b>          | 193,033,335        | 5.01               |
| <b>Repeatmasker</b> | 945,921,870        | 24.56              |
| <b>Proteinmask</b>  | 855,315,381        | 22.24              |
| <b>De novo</b>      | 2,266,569,286      | 58.85              |
| <b>Total</b>        | 2,447,074,981      | 63.53              |

**Table S5.** Summary of the TE content in three cartilaginous fishes and seven bony fishes, Related to Figure 1.

|                           | <b>Type</b> | <b>DNA</b>  | <b>LINE</b>   | <b>SINE</b> | <b>LTR</b>  | <b>Total</b>  |
|---------------------------|-------------|-------------|---------------|-------------|-------------|---------------|
| Bamboo shark              | Length (bp) | 84,246,842  | 1,841,705,606 | 151,630,200 | 707,421,972 | 2,240,930,640 |
|                           | % in genome | 2.19        | 47.88         | 3.94        | 18.39       | 58.26         |
| Elephant shark            | Length (bp) | 20,045,841  | 375,567,981   | 150,517,703 | 119,161,620 | 444,674,297   |
|                           | % in genome | 2.06        | 38.54         | 15.45       | 12.23       | 45.63         |
| Whale shark               | Length (bp) | 44,888,512  | 1,482,979,651 | 102,877,514 | 120,791,609 | 1,608,053,993 |
|                           | % in genome | 1.53        | 50.59         | 3.51        | 4.12        | 54.85         |
| Coelacanth                | Length (bp) | 682,694,273 | 654,465,678   | 345,675,101 | 219,465,253 | 1,253,477,861 |
|                           | % in genome | 23.87       | 22.88         | 12.08       | 7.67        | 43.82         |
| Three-spined sticklebacks | Length (bp) | 35,650,096  | 28,697,415    | 3,533,002   | 30,466,795  | 82,399,819    |
|                           | % in genome | 7.72        | 6.22          | 0.77        | 6.6         | 17.85         |
|                           | Length (bp) | 50,367,111  | 26,418,884    | 3,139,446   | 17,332,054  | 85,823,340    |

|                      |             |             |            |            |            |             |
|----------------------|-------------|-------------|------------|------------|------------|-------------|
| Large yellow croaker | % in genome | 7.77        | 4.07       | 0.48       | 2.67       | 13.24       |
| Medaka               | Length (bp) | 126,716,317 | 90,435,719 | 9,001,570  | 62,654,967 | 253,215,905 |
|                      | % in genome | 14.58       | 10.41      | 1.04       | 7.21       | 29.14       |
| Torafugu             | Length (bp) | 21,275,275  | 22,316,804 | 1,056,847  | 15,374,370 | 49,743,515  |
|                      | % in genome | 5.43        | 5.7        | 0.27       | 3.93       | 12.71       |
| Zebrafish            | Length (bp) | 599,266,189 | 59,287,717 | 36,817,925 | 79,463,691 | 744,738,398 |
|                      | % in genome | 43.69       | 4.32       | 2.68       | 5.79       | 54.29       |
| Tongue soles         | Length (bp) | 36,780,534  | 17,599,748 | 1,876,835  | 11,627,464 | 59,151,167  |
|                      | % in genome | 7.82        | 3.74       | 0.4        | 2.47       | 12.58       |

**Table S6.** Evaluation of the final gene set by using BUSCO, Related to Figure 1.

| Description                                | Gene number | Percent (%) |
|--------------------------------------------|-------------|-------------|
| <b>Complete BUSCOs (C)</b>                 | 2,477       | 95.78       |
| <b>Complete and single-copy BUSCOs (S)</b> | 2,372       | 91.72       |
| <b>Complete and duplicated BUSCOs (D)</b>  | 105         | 4.06        |
| <b>Fragmented BUSCOs (F)</b>               | 68          | 2.62        |
| <b>Missing BUSCOs (M)</b>                  | 41          | 1.59        |
| <b>Total BUSCO groups searched</b>         | 2,586       | 100.00      |

**Table S7.** Distribution of paralogous genes in the bamboo shark genome. The yellow highlighted numbers represent gene pairs more than 20, Related to Figure 2.



|       |     |             |    |        |           |       |
|-------|-----|-------------|----|--------|-----------|-------|
| chr5  | 575 | 124,146,585 | 23 | 4.00%  | 1,105,727 | 0.89% |
| chr6  | 585 | 121,738,290 | 50 | 8.55%  | 2,069,570 | 1.70% |
| chr7  | 622 | 118,101,210 | 47 | 7.56%  | 2,127,210 | 1.80% |
| chr8  | 243 | 107,642,081 | 12 | 4.94%  | 480,197   | 0.45% |
| chr9  | 558 | 105,880,166 | 39 | 6.99%  | 2,021,688 | 1.91% |
| chr10 | 538 | 95,765,976  | 42 | 7.81%  | 1,588,937 | 1.66% |
| chr11 | 572 | 94,731,789  | 61 | 10.66% | 2,023,263 | 2.14% |
| chr12 | 518 | 88,215,905  | 39 | 7.53%  | 2,187,022 | 2.48% |
| chr13 | 528 | 84,432,200  | 50 | 9.47%  | 2,150,712 | 2.55% |
| chr14 | 412 | 82,264,610  | 29 | 7.04%  | 1,163,437 | 1.41% |
| chr15 | 397 | 81,258,972  | 39 | 9.82%  | 1,354,341 | 1.67% |
| chr16 | 394 | 76,207,864  | 30 | 7.61%  | 1,873,298 | 2.46% |
| chr17 | 441 | 73,167,756  | 38 | 8.62%  | 1,830,134 | 2.50% |
| chr18 | 404 | 72,140,527  | 31 | 7.67%  | 1,036,258 | 1.44% |
| chr19 | 430 | 69,975,007  | 35 | 8.14%  | 1,285,421 | 1.84% |
| chr20 | 362 | 64,470,864  | 34 | 9.39%  | 1,182,523 | 1.83% |
| chr21 | 446 | 60,475,494  | 47 | 10.54% | 2,309,047 | 3.82% |
| chr22 | 366 | 59,434,692  | 23 | 6.28%  | 847,973   | 1.43% |
| chr23 | 350 | 58,390,607  | 43 | 12.29% | 2,161,640 | 3.70% |
| chr24 | 357 | 56,061,091  | 36 | 10.08% | 1,334,444 | 2.38% |
| chr25 | 386 | 54,600,476  | 55 | 14.25% | 2,741,762 | 5.02% |
| chr26 | 325 | 53,348,395  | 26 | 8.00%  | 1,286,581 | 2.41% |
| chr27 | 303 | 51,668,882  | 32 | 10.56% | 810,993   | 1.57% |
| chr28 | 348 | 51,251,456  | 35 | 10.06% | 1,381,797 | 2.70% |
| chr29 | 249 | 49,130,325  | 21 | 8.43%  | 979,109   | 1.99% |
| chr30 | 324 | 47,581,304  | 26 | 8.02%  | 1,099,286 | 2.31% |
| chr31 | 389 | 45,411,694  | 34 | 8.74%  | 1,264,812 | 2.79% |
| chr32 | 255 | 45,129,243  | 20 | 7.84%  | 990,196   | 2.19% |
| chr33 | 307 | 43,998,411  | 27 | 8.79%  | 859,422   | 1.95% |
| chr34 | 311 | 43,401,492  | 37 | 11.90% | 1,292,584 | 2.98% |
| chr35 | 217 | 42,304,929  | 29 | 13.36% | 1,096,282 | 2.59% |
| chr36 | 239 | 38,655,811  | 16 | 6.69%  | 689,636   | 1.78% |
| chr37 | 360 | 35,007,441  | 1  | 0.28%  | 1,574     | 0.00% |



|       |     |            |    |       |         |       |
|-------|-----|------------|----|-------|---------|-------|
| chr38 | 205 | 30,225,729 | 12 | 5.85% | 441,029 | 1.46% |
| chr39 | 340 | 27,915,349 | 11 | 3.24% | 259,694 | 0.93% |
| chr40 | 205 | 26,992,261 | 12 | 5.85% | 358,743 | 1.33% |
| chr41 | 212 | 20,367,195 | 5  | 2.36% | 142,612 | 0.70% |
| chr42 | 225 | 19,796,787 | 12 | 5.33% | 221,910 | 1.12% |
| chr43 | 149 | 16,392,901 | 5  | 3.36% | 109,590 | 0.67% |
| chr44 | 177 | 15,333,346 | 0  | 0.00% | 0       | 0.00% |
| chr45 | 188 | 13,660,452 | 0  | 0.00% | 0       | 0.00% |
| chr46 | 57  | 12,823,346 | 0  | 0.00% | 0       | 0.00% |
| chr47 | 73  | 10,712,325 | 0  | 0.00% | 0       | 0.00% |
| chr48 | 124 | 9,987,384  | 0  | 0.00% | 0       | 0.00% |
| chr49 | 13  | 9,983,820  | 0  | 0.00% | 0       | 0.00% |
| chr50 | 49  | 8,079,144  | 0  | 0.00% | 0       | 0.00% |
| chr51 | 97  | 4,637,688  | 0  | 0.00% | 0       | 0.00% |

**Table S9.** Enrichment analysis for genes in chromosomes 8, 37, 39, 41, 43, 44, 45, 46, 47,48,49, 50 and 51, Related to Figure 2.

| <b>Pathway</b>                               | <b>Level</b>                      | <b>Gene number</b> | <b>Q-value</b> |
|----------------------------------------------|-----------------------------------|--------------------|----------------|
| Systemic lupus erythematosus                 | Immune diseases                   | 66                 | 6.08E-23       |
| Staphylococcus aureus infection              | Infectious diseases:<br>Bacterial | 47                 | 1.40E-14       |
| Asthma                                       | Immune diseases                   | 36                 | 1.84E-14       |
| Intestinal immune network for IgA production | Immune system                     | 40                 | 4.66E-14       |
| Malaria                                      | Infectious diseases:<br>Parasitic | 37                 | 1.05E-12       |
| Measles                                      | Infectious diseases: Viral        | 59                 | 2.02E-10       |
| Mineral absorption                           | Digestive system                  | 48                 | 3.52E-10       |
| Allograft rejection                          | Immune diseases                   | 36                 | 1.15E-09       |

|                                           |                                     |    |          |
|-------------------------------------------|-------------------------------------|----|----------|
| NF-kappa B signaling pathway              | Signal transduction                 | 54 | 1.34E-09 |
| Autoimmune thyroid disease                | Immune diseases                     | 37 | 6.19E-09 |
| Graft-versus-host disease                 | Immune diseases                     | 28 | 1.25E-08 |
| Inflammatory bowel disease (IBD)          | Immune diseases                     | 32 | 4.87E-08 |
| T cell receptor signaling pathway         | Immune system                       | 45 | 6.48E-08 |
| Chagas disease (American trypanosomiasis) | Infectious diseases:<br>Parasitic   | 43 | 7.64E-08 |
| Type I diabetes mellitus                  | Endocrine and metabolic diseases    | 28 | 2.04E-07 |
| Viral myocarditis                         | Cardiovascular diseases             | 40 | 2.04E-06 |
| Rheumatoid arthritis                      | Immune diseases                     | 41 | 2.39E-06 |
| Antigen processing and presentation       | Immune system                       | 34 | 6.26E-06 |
| Cell adhesion molecules (CAMs)            | Signaling molecules and interaction | 51 | 5.33E-05 |
| Alcoholism                                | Substance dependence                | 39 | 5.71E-05 |
| HTLV-I infection                          | Infectious diseases: Viral          | 63 | 2.90E-04 |
| Transcriptional misregulation in cancer   | Cancers: Overview                   | 56 | 7.29E-04 |
| Ras signaling pathway                     | Signal transduction                 | 56 | 7.22E-03 |
| Calcium signaling pathway                 | Signal transduction                 | 52 | 8.39E-03 |
| Leishmaniasis                             | Infectious diseases:<br>Parasitic   | 22 | 8.68E-03 |
| Rap1 signaling pathway                    | Signal transduction                 | 57 | 8.90E-03 |
| Viral carcinogenesis                      | Cancers: Overview                   | 44 | 2.35E-02 |
| Tuberculosis                              | Infectious diseases:<br>Bacterial   | 37 | 6.91E-02 |

---

**Table S12.** List of MHC class II genes in analyzed species, Related to Figure 3.

| Species            | Gene ID                                                                  | Description from KEGG                                                       |
|--------------------|--------------------------------------------------------------------------|-----------------------------------------------------------------------------|
| Medaka             | ENSORLT0000000027                                                        | HLA class II histocompatibility antigen, DP alpha 1 chain-like;             |
|                    | ENSORLT00000016063                                                       | rano class II histocompatibility antigen, A beta chain-like;                |
|                    | ENSORLT00000005537                                                       | CD74 molecule, major histocompatibility complex, class II invariant chain a |
|                    | ENSORLT00000016021                                                       | Orla-DDA; RLA class II histocompatibility antigen, DP alpha-1 chain;        |
|                    | ENSORLT00000000030                                                       | Orla-DCB; H-2 class II histocompatibility antigen, E-S beta chain;          |
|                    | ENSORLT00000023575                                                       | Orla-DAA; mamu class II histocompatibility antigen, DR alpha chain;         |
|                    | ENSORLT00000023543                                                       | Orla-DAB; H-2 class II histocompatibility antigen, E-S beta chain;          |
|                    | ENSORLT00000011500                                                       | Orla-DEA; RLA class II histocompatibility antigen, DP alpha-1 chain-like;   |
|                    | ENSORLT00000016052                                                       | Orla-DDB; rano class II histocompatibility antigen, A beta chain;           |
|                    | ENSORLT00000024164                                                       | Orla-DFA; mamu class II histocompatibility antigen, DR alpha chain;         |
|                    | ENSORLT00000006056                                                       | H-2 class II histocompatibility antigen, A-U alpha chain-like;              |
|                    | ENSORLT00000024129                                                       | H-2 class II histocompatibility antigen, E-S beta chain-like;               |
| Coelacanth         | ENSLACT00000001762                                                       | H-2 class II histocompatibility antigen, E-S beta chain-like;               |
|                    | ENSLACT00000000411                                                       | DLA class II histocompatibility antigen, DR-1 beta chain-like;              |
|                    | ENSLACT00000000328                                                       | SLA class II histocompatibility antigen, DQ haplotype C beta chain-like;    |
|                    | ENSLACT00000000754                                                       | HLA class II histocompatibility antigen, DP alpha 1 chain-like;             |
|                    | ENSLACT00000000891                                                       | rano class II histocompatibility antigen, D-1 beta chain-like;              |
|                    | ENSLACT00000003230                                                       | RLA class II histocompatibility antigen, DP alpha-1 chain-like;             |
|                    | ENSLACT00000000197                                                       | H-2 class II histocompatibility antigen, A-D beta chain-like;               |
|                    | ENSLACT00000000493                                                       | DLA class II histocompatibility antigen, DR-1 beta chain-like;              |
|                    | ENSLACT00000000162                                                       | rano class II histocompatibility antigen, D-1 beta chain-like;              |
|                    | ENSLACT00000002416                                                       | RLA class II histocompatibility antigen, DP alpha-1 chain-like;             |
|                    | ENSLACT00000002328                                                       | DLA class II histocompatibility antigen, DR-1 beta chain-like;              |
|                    | ENSLACT00000009069                                                       | DLA class II histocompatibility antigen, DR-1 beta chain-like;              |
| ENSLACT00000004598 | SLA class II histocompatibility antigen, DQ haplotype C beta chain-like; |                                                                             |
| ENSLACT00000000968 | H-2 class II histocompatibility antigen, A-B alpha chain-like;           |                                                                             |
| ENSLACT00000000721 | H-2 class II histocompatibility antigen, A-U alpha chain-like;           |                                                                             |

|              |                    |                                                                                                            |
|--------------|--------------------|------------------------------------------------------------------------------------------------------------|
|              | ENSLACT00000000561 | DLA class II histocompatibility antigen, DR-1 beta chain-like;                                             |
|              | ENSLACT00000008726 | DLA class II histocompatibility antigen, DR-1 beta chain-like;                                             |
|              | ENSLACT00000000289 | SLA class II histocompatibility antigen, DQ haplotype C beta chain-like;                                   |
|              | ENSLACT00000006607 | H-2 class II histocompatibility antigen, E-S beta chain-like;                                              |
|              | ENSGACT00000000421 | H-2 class II histocompatibility antigen, A-U alpha chain-like;                                             |
|              | ENSGACT00000025242 | Orla-DAA; mamu class II histocompatibility antigen, DR alpha chain;                                        |
|              | ENSGACT00000000431 | H-2 class II histocompatibility antigen, E-S beta chain-like;                                              |
|              | ENSGACT00000004860 | rano class II histocompatibility antigen, A beta chain-like;                                               |
| Three-       | ENSGACT00000025238 | Orla-DAB; H-2 class II histocompatibility antigen, E-S beta chain;                                         |
| spined       | ENSGACT00000000450 | Orla-DAB; H-2 class II histocompatibility antigen, E-S beta chain;                                         |
| sticklebacks | ENSGACT00000000437 | HLA class II histocompatibility antigen, DRB1-8 beta chain-like;                                           |
|              | ENSGACT00000023783 | H-2 class II histocompatibility antigen, E-S beta chain-like;                                              |
|              | ENSGACT00000004910 | H-2 class II histocompatibility antigen, A-U alpha chain-like;                                             |
|              | ENSGACT00000000439 | Orla-DAA; mamu class II histocompatibility antigen, DR alpha chain;                                        |
|              | ENSGACT00000000434 | H-2 class II histocompatibility antigen, A-U alpha chain-like;                                             |
|              | ENSDART00000006898 | novel protein with a Class II histocompatibility antigen, alpha domain and a Immunoglobulin C1-set domain; |
|              | ENSDART00000161194 | MHCII, si:busm1-48c11.4, si:dz194e12.12, si:dz48c11.4, zgc:123061; si:busm1-194e12.12;                     |
|              | ENSDART00000102847 | si:dz48c11.3; si:busm1-48c11.3;                                                                            |
|              | ENSDART00000160609 | mhc2dab, major histocompatibility complex class II DAB gene;                                               |
|              | ENSDART00000129901 | novel protein with a Class II histocompatibility antigen, alpha domain and a Immunoglobulin C1-set domain; |
| Zebrafish    | ENSDART00000109439 | MHCII, si:busm1-160c18.10, si:dz160c18.10, si:dz194e12.8, zgc:101701; si:busm1-194e12.8;                   |
|              | ENSDART00000099281 | mhc2dcb, major histocompatibility complex class II DCB gene;                                               |
|              | ENSDART00000097932 | MHCII, si:busm1-48c11.4, si:dz194e12.12, si:dz48c11.4, zgc:123061; si:busm1-194e12.12;                     |
|              | ENSDART00000159361 | MHCII, si:busm1-48c11.4, si:dz194e12.12, si:dz48c11.4, zgc:123061; si:busm1-194e12.12;                     |
|              | ENSDART00000162877 | si:dz48c11.3; si:busm1-48c11.3;                                                                            |

|              |                    |                                                                                                                                |
|--------------|--------------------|--------------------------------------------------------------------------------------------------------------------------------|
|              | ENSDART00000159276 | MHCII, si:busm1-48c11.4, si:dz194e12.12, si:dz48c11.4, zgc:123061; si:busm1-194e12.12;                                         |
|              | ENSDART00000123658 | mhc2dcb, si:busm1-243a08.1, si:busm1-37i06.8, si:dz243a08.1, si:dz37i06.8; major histocompatibility complex class II DCB gene; |
|              | ENSDART00000053205 | CD74 molecule, major histocompatibility complex, class II invariant chain a;                                                   |
|              | ENSDART00000168831 | mhc2dab, major histocompatibility complex class II DAB gene;                                                                   |
|              | ENSDART00000168076 | mhc2dab,major histocompatibility complex class II DAB gene;                                                                    |
|              | ENSDART00000171760 | si:dz48c11.3; si:busm1-48c11.3;                                                                                                |
|              | ENSDART00000026021 | CD74 molecule, major histocompatibility complex, class II invariant chain a;                                                   |
|              | ENSDART00000158400 | MHCII, si:busm1-160c18.10, si:dz160c18.10, si:dz194e12.8, zgc:101701; si:busm1-194e12.8;                                       |
|              | ENSDART00000158784 | mhc2dcb, si:busm1-243a08.1, si:busm1-37i06.8, si:dz243a08.1, si:dz37i06.8; major histocompatibility complex class II DCB gene; |
|              | ENSDART00000048448 | uncharacterized LOC791723;                                                                                                     |
|              | ENSDART00000105025 | H-2 class II histocompatibility antigen, E-D beta chain-like;                                                                  |
| Whale shark  | XP_020390554.1     | ORAN-DRA; MHC class II DR alpha;                                                                                               |
|              | XP_020390555.1     | DRB, DRB1, Mamu-DRB, Mamu-DRB1, Mane-DRB; HLA class II histocompatibility antigen, DRB1-3 chain;                               |
|              | XP_020392206.1     | DLA class II histocompatibility antigen, DR-1 beta chain-like;                                                                 |
| Bamboo shark | Chipl12839         | DLA class II histocompatibility antigen, DR-1 beta chain-like;                                                                 |
|              | Chipl12840         | RLA class II histocompatibility antigen, DP alpha-1 chain-like;                                                                |
|              | Chipl12907         | RLA class II histocompatibility antigen, DP alpha-1 chain-like;                                                                |
|              | Chipl01708         | class II histocompatibility antigen, B-L beta chain-like;                                                                      |
|              | Chipl14140         | SAHA-DAB; HLA class II histocompatibility antigen, DRB1-15 beta chain;                                                         |
|              | Chipl18694         | HLA class II histocompatibility antigen, DR alpha chain-like;                                                                  |

**Table S13.**MHC class II fragments detected by using BLAST in the elephant shark genome, Related to Figure 3.

| Target scaffolds | Query sequences    | Identity | Target Start | Target End | Query start | Query End | E value  |
|------------------|--------------------|----------|--------------|------------|-------------|-----------|----------|
| NW_006895284.1   | ENSGACT00000025242 | 93.55    | 2641         | 2671       | 32          | 2         | 2.00E-06 |
| NW_006895810.1   | ENSGACT00000025242 | 93.55    | 3175         | 3205       | 32          | 2         | 2.00E-06 |

|                |                    |       |      |      |     |     |          |
|----------------|--------------------|-------|------|------|-----|-----|----------|
| NW_006896611.1 | ENSGACT00000025242 | 93.55 | 2160 | 2190 | 2   | 32  | 2.00E-06 |
| NW_006896785.1 | ENSGACT00000025242 | 93.55 | 283  | 313  | 2   | 32  | 2.00E-06 |
| NW_006896886.1 | ENSGACT00000025242 | 93.55 | 1221 | 1251 | 32  | 2   | 2.00E-06 |
| NW_006898245.1 | Chip112840         | 86.96 | 355  | 400  | 299 | 344 | 4.00E-06 |
| NW_006898335.1 | ENSGACT00000025242 | 93.33 | 175  | 204  | 32  | 3   | 4.00E-06 |
| NW_006900613.1 | ENSGACT00000025242 | 93.55 | 354  | 384  | 2   | 32  | 9.00E-07 |
| NW_006910024.1 | ENSGACT00000025242 | 93.55 | 622  | 652  | 32  | 2   | 6.00E-07 |

**Table S14.** Designed primers for amplifying vNARs, Related to Figure 3.

| Forward primer                                        | Reverse primer                                     |
|-------------------------------------------------------|----------------------------------------------------|
| 1 F1:GGGTTGAACACCGACAAACTGCAGGGGT<br>TGAACAAACACCGACA | R1:ATAAGAATGCGGCCGCAATCCATTTG<br>CCCTCTGTTCT       |
| 2 F2:AACTGCAGCCAAACACCGAGAACAATAAC<br>G               | R2:ATAAGAATGCGGCCGCGAAATCCGT<br>TTGCTCTCTGTTCT     |
| 3 F3:AACTGCAGCCAAACACCGAAAACGATAAT<br>AA              | R3:ATAAGAATGCGGCCGCGCCAGAAATCC<br>GTTTACTCTCTGTTCT |
| 4 F4:AACTGCAGCCGAGATCAGCAACAAAAC<br>TC                | R4:ATAAGAATGCGGCCGCAATCCGTTTG<br>CTCTCTTTTCTTC     |

**Table S15.** Ancestral P2X gene found in amphioxus and ascidiacea genomes, Related to Figure 4.

| Name/Gene ID            | Description                                                           |
|-------------------------|-----------------------------------------------------------------------|
| LOC109481458            | P2X purinoceptor 7-like [Branchiostoma belcheri (Belcher's lancelet)] |
| LOC109474372            | P2X purinoceptor 7-like [Branchiostoma belcheri (Belcher's lancelet)] |
| LOC109472980            | P2X purinoceptor 7-like [Branchiostoma belcheri (Belcher's lancelet)] |
| LOC109464342            | P2X purinoceptor 4-like [Branchiostoma belcheri (Belcher's lancelet)] |
| LOC109462847            | P2X purinoceptor 7-like [Branchiostoma belcheri (Belcher's lancelet)] |
| LOC109462011            | P2X purinoceptor 7-like [Branchiostoma belcheri (Belcher's lancelet)] |
| BRAFLDRAFT_84310(P2RX4) | hypothetical protein [Branchiostoma floridae (Florida lancelet)]      |
| BRAFLDRAFT_103732       | hypothetical protein [Branchiostoma floridae (Florida lancelet)]      |
| LOC101242976            | P2X purinoceptor 7-like [Ciona intestinalis (vase tunicate)]          |
| LOC101242780            | P2X purinoceptor 7-like [Ciona intestinalis (vase tunicate)]          |

**Table S16.** Protein length of P2X genes in bony fishes and sea lamprey, Related to Figure 4.

|             | <b>Gene ID</b>     | <b>Protein Length(aa)</b> | <b>Gene Name</b> |
|-------------|--------------------|---------------------------|------------------|
| Coelacanth  | ENSLACT00000004839 | 399                       | P2RX3            |
|             | ENSLACT00000021101 | 403                       | P2RX1            |
|             | ENSLACT00000019925 | 388                       | P2RX2            |
|             | ENSLACT00000025971 | 134                       | P2RX7            |
|             | ENSLACT00000001552 | 363                       | P2RX5            |
|             | ENSLACT00000002031 | 419                       | P2RX6            |
|             | ENSLACT00000024921 | 391                       | P2RX4            |
|             | ENSDART00000167907 | 597                       | p2rx7            |
| Zebrafish   | ENSDART00000002866 | 398                       | p2rx1            |
|             | ENSDART00000098969 | 401                       | p2rx4b           |
|             | ENSDART00000019461 | 400                       | p2rx2            |
|             | ENSDART00000130628 | 398                       | p2rx4a           |
|             | ENSDART00000171919 | 482                       | p2rx5            |
|             | ENSDART00000163914 | 411                       | p2rx3a           |
|             | ENSDART00000133926 | 412                       | p2rx3b           |
|             | ENSDART00000029063 | 391                       | p2rx5            |
|             | ENSORLT00000014760 | 397                       | p2rx1            |
|             | ENSORLT00000004381 | 405                       | p2rx3            |
| Medaka      | ENSORLT00000019713 | 392                       | p2rx4            |
|             | ENSORLT00000015083 | 458                       | p2rx5            |
|             | ENSORLT00000009830 | 412                       | p2rx2            |
|             | PMZ_0041355-RA_PMZ | 79                        | p2rx5.L          |
| Sea lamprey | PMZ_0041356-RA_PMZ | 205                       | P2RX5            |
|             | PMZ_0048630-RA_PMZ | 169                       | p2rx5.S          |
|             | PMZ_0048646-RA_PMZ | 160                       | p2rx5.S          |
|             | PMZ_0037740-RA_PMZ | 225                       | P2RX5            |
|             | PMZ_0034936-RA_PMZ | 160                       | p2rx5.S          |
|             | PMZ_0048622-RA_PMZ | 160                       | p2rx5.S          |
|             | PMZ_0046842-RA_PMZ | 74                        | p2rx5            |
|             | PMZ_0036668-RA_PMZ | 99                        | p2rx5.S          |

|                    |     |         |
|--------------------|-----|---------|
| PMZ_0035061-RA_PMZ | 246 | P2RX5   |
| PMZ_0048786-RA_PMZ | 97  | p2rx5.S |
| PMZ_0037023-RA_PMZ | 98  | p2rx5.S |
| PMZ_0036851-RA_PMZ | 244 | P2RX5   |
| PMZ_0048482-RA_PMZ | 154 | P2RX5   |

---

Altschul, S.F., Gish, W., Miller, W., Myers, E.W., and Lipman, D.J. (1990). Basic local alignment search tool. *J Mol Biol* 215, 403-410.

Andrews, S., and FastQC, A. (2015). A quality control tool for high throughput sequence data. 2010. Google Scholar.

Benson, G. (1999). Tandem repeats finder: a program to analyze DNA sequences. *Nucleic acids research* 27, 573.

Birney, E., Clamp, M., and Durbin, R. (2004). GeneWise and genomewise. *Genome research* 14, 988-995.

Dudchenko, O., Batra, S.S., Omer, A.D., Nyquist, S.K., Hoeger, M., Durand, N.C., Shamim, M.S., Machol, I., Lander, E.S., Aiden, A.P., *et al.* (2017). De novo assembly of the *Aedes aegypti* genome using Hi-C yields chromosome-length scaffolds. *Science* 356, 92-95.

Durand, N.C., Shamim, M.S., Machol, I., Rao, S.S., Huntley, M.H., Lander, E.S., and Aiden, E.L. (2016). Juicer Provides a One-Click System for Analyzing Loop-Resolution Hi-C Experiments. *Cell Syst* 3, 95-98.

Edgar, R.C. (2004). MUSCLE: multiple sequence alignment with high accuracy and high throughput. *Nucleic acids research* 32, 1792-1797.

Elsik, C.G., Mackey, A.J., Reese, J.T., Milshina, N.V., Roos, D.S., and Weinstock, G.M. (2007). Creating a honey bee consensus gene set. *Genome biology* 8, 1.

Haas, B.J., Papanicolaou, A., Yassour, M., Grabherr, M., Blood, P.D., Bowden, J., Couger, M.B., Eccles, D., Li, B., Lieber, M., *et al.* (2013). De novo transcript sequence reconstruction from RNA-seq using the Trinity platform for reference generation and analysis. *Nat Protoc* 8, 1494-1512.

Jurka, J., Kapitonov, V.V., Pavlicek, A., Klonowski, P., Kohany, O., and Walichiewicz, J. (2005). Repbase Update, a database of eukaryotic repetitive elements. *Cytogenetic and genome research* 110, 462-467.

Kajitani, R., Toshimoto, K., Noguchi, H., Toyoda, A., Ogura, Y., Okuno, M., Yabana, M., Harada, M., Nagayasu, E., Maruyama, H., *et al.* (2014). Efficient de novo assembly of highly heterozygous genomes from whole-genome shotgun short reads. *Genome Res* 24, 1384-1395.

Kent, W.J. (2002). BLAT--the BLAST-like alignment tool. *Genome Res* 12, 656-664.



Li, H. (2011). A statistical framework for SNP calling, mutation discovery, association mapping and population genetical parameter estimation from sequencing data. *Bioinformatics* 27, 2987-2993.

Li, H., Coghlan, A., Ruan, J., Coin, L.J., Heriche, J.K., Osmotherly, L., Li, R., Liu, T., Zhang, Z., Bolund, L., *et al.* (2006). TreeFam: a curated database of phylogenetic trees of animal gene families. *Nucleic Acids Res* 34, D572-580.

Li, H., and Durbin, R. (2009). Fast and accurate short read alignment with Burrows–Wheeler transform. *Bioinformatics* 25, 1754-1760.

Luo, R., Liu, B., Xie, Y., Li, Z., Huang, W., Yuan, J., He, G., Chen, Y., Pan, Q., and Liu, Y. (2012). SOAPdenovo2: an empirically improved memory-efficient short-read de novo assembler. *Gigascience* 1, 18.

MA, Q., WANG, S.-f., WANG, J., and SU, Y.-q.J.J.o.X.U. (2008). Analysis of the Karyotype of *Chiloscyllium plagiosum* [J]. 6.

Mohr, D.W., Naguib, A., Weisenfeld, N., Kumar, V., Shah, P., Church, D.M., Jaffe, D., and Scott, A.F. (2017). Improved de novo Genome Assembly: Synthetic long read sequencing combined with optical mapping produce a high quality mammalian genome at relatively low cost. *bioRxiv*, 128348.

Pertea, M., Kim, D., Pertea, G.M., Leek, J.T., and Salzberg, S.L. (2016). Transcript-level expression analysis of RNA-seq experiments with HISAT, StringTie and Ballgown. *Nat Protoc* 11, 1650-1667.

Price, M.N., Dehal, P.S., and Arkin, A.P. (2010). FastTree 2—approximately maximum-likelihood trees for large alignments. *PloS one* 5, e9490.

Salse, J., Abrouk, M., Murat, F., Quraishi, U.M., and Feuillet, C. (2009). Improved criteria and comparative genomics tool provide new insights into grass paleogenomics. *Briefings in bioinformatics* 10, 619-630.

Servant, N., Varoquaux, N., Lajoie, B.R., Viara, E., Chen, C.J., Vert, J.P., Heard, E., Dekker, J., and Barillot, E. (2015). HiC-Pro: an optimized and flexible pipeline for Hi-C data processing. *Genome Biol* 16, 259.

Stanke, M., Keller, O., Gunduz, I., Hayes, A., Waack, S., and Morgenstern, B. (2006). AUGUSTUS: ab initio prediction of alternative transcripts. *Nucleic acids research* 34, W435-W439.

Tang, H., Wang, X., Bowers, J.E., Ming, R., Alam, M., and Paterson, A.H. (2008). Unraveling ancient hexaploidy through multiply-aligned angiosperm gene maps. *Genome research*, gr. 080978.080108.

Tarailo-Graovac, M., and Chen, N. (2009). Using RepeatMasker to identify repetitive elements in genomic sequences. *Current Protocols in Bioinformatics*, 4.10. 11-14.10. 14.

Wang, O., Chin, R., Cheng, X., Wu, M.K.Y., Mao, Q., Tang, J., Sun, Y., Anderson, E., Lam, H.K., and Chen, D. (2019). Efficient and unique cobarcoding of second-generation sequencing reads from long DNA molecules enabling cost-effective and accurate sequencing, haplotyping, and de novo assembly. *Genome research* 29, 798-808.

Xu, Z., and Wang, H. (2007). LTR\_FINDER: an efficient tool for the prediction of full-length LTR retrotransposons. *Nucleic acids research* 35, W265-W268.

Yang, Z. (2007). PAML 4: phylogenetic analysis by maximum likelihood. *Mol Biol Evol* 24, 1586-1591.

Yang, Z., and Rannala, B. (2006). Bayesian estimation of species divergence times under a molecular clock using multiple fossil calibrations with soft bounds. *Mol Biol Evol* 23, 212-226.
